# Supplementary material for: The Occurrence of Mycotoxins in Raw Materials and Fish Feeds in Europe and the Potential Effects of Deoxynivalenol (DON) on the Health and Growth of Farmed Fish Species—A Review
Source: MDPI journal article supplement (doi:10.3390/toxins13060403), 2021-06-05
Supplement: s1 [file s1]

**Table S1.** Legal mycotoxins limits in animal feed ingredients and (fish) feeds set by European Commission.

| Undesirable substance                                                                                                                                                                    | Products intended for animal feed                                                                        | Maximum content in µg/kg (ppb) relative to a feed with a moisture content of 12 % |
|------------------------------------------------------------------------------------------------------------------------------------------------------------------------------------------|----------------------------------------------------------------------------------------------------------|-----------------------------------------------------------------------------------|
| DIRECTIVE 2002/32/EC OF THE EUROPEAN PARLIAMENT AND OF THE COUNCIL of 7 May 2002 on undesirable substances in animal feed (EC, 2002)                                                     |                                                                                                          |                                                                                   |
| <i>Aflatoxin B1</i>                                                                                                                                                                      |                                                                                                          |                                                                                   |
|                                                                                                                                                                                          | Feed materials                                                                                           | 20                                                                                |
|                                                                                                                                                                                          | Complementary and complete feed                                                                          | 10                                                                                |
| COMMISSION RECOMMENDATION of 17 August 2006 on the presence of deoxynivalenol, zearalenone, ochratoxin A, T-2 and HT-2 and fumonisins in products intended for animal feeding (EC, 2006) |                                                                                                          |                                                                                   |
| <i>Deoxynivalenol</i>                                                                                                                                                                    |                                                                                                          |                                                                                   |
|                                                                                                                                                                                          | Cereals and cereal products with the exception of maize by-products                                      | 8000                                                                              |
|                                                                                                                                                                                          | Complementary and complete feedingstuffs with the exception of pigs, calves (< 4 months), lambs and kids | 5000                                                                              |
| <i>Zearalenone</i>                                                                                                                                                                       |                                                                                                          |                                                                                   |
|                                                                                                                                                                                          | Cereals and cereal products with the exception of maize by-products                                      | 2000                                                                              |
| <i>Ochratoxin A</i>                                                                                                                                                                      |                                                                                                          |                                                                                   |
|                                                                                                                                                                                          | Cereals and cereal products                                                                              | 250                                                                               |
| <i>Fumonisin B1 + B2</i>                                                                                                                                                                 |                                                                                                          |                                                                                   |
|                                                                                                                                                                                          | Maize and maize products                                                                                 | 60000                                                                             |
|                                                                                                                                                                                          | Complementary and complete feedingstuffs for fish                                                        | 10000                                                                             |
| COMMISSION RECOMMENDATION of 27 March 2013 on the presence of T-2 and HT-2 toxin in cereals and cereal products (EC, 2013)                                                               |                                                                                                          |                                                                                   |
| <i>T-2 &amp; HT-2 Toxin</i>                                                                                                                                                              |                                                                                                          |                                                                                   |
|                                                                                                                                                                                          | Cereals and cereal products with the exception of oat bran                                               | 500                                                                               |
| COMMISSION RECOMMENDATION of 15 March 2012 on the monitoring of the presence of ergot alkaloids in feed and food (EC, 2012)                                                              |                                                                                                          |                                                                                   |
| <i>Ergot alkaloids</i>                                                                                                                                                                   |                                                                                                          |                                                                                   |
|                                                                                                                                                                                          | Feed containing unground cereals                                                                         | 1000                                                                              |
