# Supplementary material for: The Occurrence of Mycotoxins in Raw Materials and Fish Feeds in Europe and the Potential Effects of Deoxynivalenol (DON) on the Health and Growth of Farmed Fish Species—A Review
Source: MDPI journal article supplement (doi:10.3390/toxins13060403), 2021-06-05
Supplement: s1 [file s1]

**Table S3.** Limit of Detection (LOD) and Limit of Quantification (LOQ) for all mycotoxins detected in wheat, corn, soybean meal and aquafeeds.

| Mycotoxin                                    | LOD     | LOQ     |
|----------------------------------------------|---------|---------|
|                                              | (µg/kg) | (µg/kg) |
| Aflatoxin B <sub>1</sub> (AFB <sub>1</sub> ) | 0.13    | 0.43    |
| Aflatoxin B <sub>2</sub> (AFB <sub>2</sub> ) | 0.54    | 1.80    |
| Aflatoxin G <sub>1</sub> (AFG <sub>1</sub> ) | 0.15    | 0.48    |
| Aflatoxin G <sub>2</sub> (AFG <sub>2</sub> ) | 0.15    | 0.49    |
| Ochratoxin A (OTA)                           | 2.08    | 6.90    |
| Ochratoxin B                                 | 2.22    | 7.32    |
| Citrinin                                     | 0.31    | 1.02    |
| Deoxynivalenol (DON)                         | 4.35    | 14.35   |
| 3-acetyl-deoxynivalenol (3-AcDON)            | 2.30    | 7.55    |
| 15-acetyl-deoxynivalenol (15-AcDON)          | 1.80    | 5.92    |
| DON-3-Glucoside (DON3Glc)                    | 10.98   | 36.21   |
| Nivalenol (NIV)                              | 49.92   | 164.73  |
| Fusarenon X (FX)                             | 2.51    | 8.30    |
| Beauvericin (BEA)                            | 0.47    | 1.55    |
| Moniliformin (MON)                           | 1.59    | 5.23    |
| Fusaric acid (FA)                            | 2.38    | 7.84    |
| T-2 toxin                                    | 0.75    | 2.48    |
| HT-2 toxin                                   | 3.84    | 12.67   |
| Diacetoxyscirpenol (DAS)                     | 1.52    | 5.02    |
| Neosolaniol (NEO)                            | 1.82    | 6.02    |

|                                             |       |       |
|---------------------------------------------|-------|-------|
| Fumonisin B <sub>1</sub> (FB <sub>1</sub> ) | 20.63 | 68.09 |
| Fumonisin B <sub>2</sub> (FB <sub>2</sub> ) | 1.82  | 6.01  |
| Fumonisin B <sub>3</sub> (FB <sub>3</sub> ) | 5.00  | 16.49 |
| Zearalenone (ZEN)                           | 2.57  | 8.48  |
| Zearalanone                                 | 3.46  | 11.42 |
| Patulin                                     | 16.84 | 55.56 |
| Mycophenolic acid                           | 1.02  | 3.37  |
| Roquefortine C                              | 1.78  | 5.86  |
| Penicillic acid                             | 7.43  | 24.51 |
| Citreoviridin                               | 2.57  | 8.48  |
| Wortmannin                                  | 0.77  | 2.55  |
| Gliotoxin                                   | 5.66  | 18.69 |
| Sterigmatocystin                            | 0.19  | 0.61  |
| Cyclopiazonic acid                          | 0.99  | 3.27  |
| Verruculogen                                | 0.34  | 1.10  |
| Ergometrin(in)e                             | 0.58  | 1.91  |
| Ergotamin(in)e                              | 0.51  | 1.67  |
| Ergocristin(in)e                            | 2.94  | 9.71  |
| Ergosin(in)e                                | 1.16  | 3.84  |
| Ergocryptin(in)e                            | 0.81  | 2.67  |
| Lysergol                                    | 0.46  | 1.52  |
| Methylergonovine                            | 0.05  | 0.16  |
| Alternariol                                 | 1.39  | 4.60  |

---
