# Supplementary material for: The Occurrence of Mycotoxins in Raw Materials and Fish Feeds in Europe and the Potential Effects of Deoxynivalenol (DON) on the Health and Growth of Farmed Fish Species—A Review
Source: MDPI journal article supplement (doi:10.3390/toxins13060403), 2021-06-05
Supplement: s1 [file s1]

**Table S2.** Inclusion of wheat, corn and soybean meal in trout, tilapia, marine fish and carp diets.

| Country, year                        | Wheat         | Corn <sup>1</sup> | Soybean meal  |
|--------------------------------------|---------------|-------------------|---------------|
| <b><i>Trout</i></b>                  |               |                   |               |
| UK, 2008                             | 10            |                   | 15            |
| France, 2009                         | 5–10 (7.5)    | 5–8 (6.5)         | 10–15 (12.5)  |
| Greece, 2009                         | 5–15 (10)     | 5–12 (8.5)        | 10–35 (22.5)  |
| Norway, 2010                         | 12            |                   | 12            |
| <b>Average inclusion<sup>2</sup></b> | <b>10.6 %</b> | <b>7.5%</b>       | <b>15.5%</b>  |
| <b><i>Tilapia</i></b>                |               |                   |               |
| Mexico 2009                          | 15–20 (17.5)  |                   | 30            |
| Venezuela 2008                       | 34            |                   | 23            |
| Ecuador 2009                         |               | 20–30 (25)        | 40            |
| Egypt 2008                           |               | 30–40 (35)        | 20–25 (22.5)  |
| Peru 2008                            |               | 30                | 40            |
| China 2008                           |               |                   | 0–25 (12.5)   |
| Taiwan 2007                          |               |                   | 30–35 (32.5)  |
| Vietnam 2008                         |               |                   | 30–60 (45)    |
| USA 2008                             |               |                   | 30–35 (32.5)  |
| <b>Average inclusion</b>             | <b>19.9%</b>  | <b>30 %</b>       | <b>30.9 %</b> |
| <b><i>Marine fish</i></b>            |               |                   |               |
| France 2009                          | 5 – 10 (7.5)  | 10 – 18 (14)      | 15- 25 (20)   |
| Greece 2009                          | 5 – 15 (10)   | 5 – 12 (8.5)      | 10- 35 (22.5) |
| Spain 2009                           | 1 – 5 (2.5)   | 4                 |               |
| UK 2008                              | 10            |                   | 15            |
| <b>Average inclusion</b>             | <b>7.6 %</b>  | <b>8.8 %</b>      | <b>19.2 %</b> |
| <b><i>Carp<sup>3</sup></i></b>       |               |                   |               |
| China 2008                           | 0-25 (13)     | 0-25 (13)         | 0-25 (13)     |
| Egypt 2008                           | 10-25 (17.5)  | 10-25 (17.5)      | 20-25 (22.5)  |
| India 2006/7                         | 50            | 50                | 5             |
| <b>Average inclusion</b>             | <b>27%</b>    | <b>27%</b>        | <b>13.5 %</b> |

<sup>1</sup>Corn data refers to corn gluten meal in case of trout and marine species.

<sup>2</sup>Average inclusion was estimated taking into account the average/country.

<sup>3</sup>Wheat data refers to wheat bran in case of carp.
