# Supplementary material for: The Occurrence of Mycotoxins in Raw Materials and Fish Feeds in Europe and the Potential Effects of Deoxynivalenol (DON) on the Health and Growth of Farmed Fish Species—A Review
Source: Toxins (Basel). 2021 Jun 5;13(6):403. doi: 10.3390/toxins13060403 (PMC8226812; doi:10.3390/toxins13060403)
Supplement: Supplementary file 1 [file toxins-13-00403-s001.zip]

Archive with 7 entries (7 files):
- Table S1, EU limits.pdf
- Table S2, Inclusion of ingredients in fish diets.pdf
- Table S3. Limit of Detection and Limit of Quantification.pdf
- Table S4. Summary of DON studies used for systematic review and risk assessment.xlsx
- Table S5. Data points for LOEL and NOAEL used in the risk assessment.xlsx
- Table S6. Predicted CC5 datapoints.xlsx
- Table S7. Summary of DON studies used for the meta-analysis.xlsx
