# Supplementary material for: The Occurrence of Mycotoxins in Raw Materials and Fish Feeds in Europe and the Potential Effects of Deoxynivalenol (DON) on the Health and Growth of Farmed Fish Species—A Review
Source: Toxins (Basel). 2021 Jun 5;13(6):403. doi: 10.3390/toxins13060403 (PMC8226812; doi:10.3390/toxins13060403)
Supplement: Supplementary file 1 [file toxins-13-00403-s001.zip › Table S4. Summary of DON studies used for systematic review and risk assessment.xlsx]

## Sheet: Sheet1
Table S4. Summary of DON studies used for systematic review and risk assessment.
Species	Toxin	Experimental set-up	Exposure time (days)	Contamination source	Application mode	Doses (μg/kg)	Age	Effect	Endpoint	Lowest Observed Adverse Effect Level (LOAEL)	No Observed Adverse Effect Level (NOAEL)	Author	Year	Journal	Publication title
Atlantic salmon (Salmo salar)	DON	in-vivo	56	Pure	Feed	0, 2000, 6000	Post-smolt (12 months)	Reduced feed intake, reduced weight gain	Growth performance	6000	2000	Bernhoft et al.	2017	Food Additives and Contaminants - Part A Chemistry, Analysis, Control, Exposure and Risk Assessment	Tissue distribution and elimination of deoxynivalenol and ochratoxin A in dietary-exposed Atlantic salmon (Salmo salar)
Atlantic salmon (Salmo salar)	DON	in-vivo	56	Pure	Feed	0, 500, 1000, 2000, 4000, 6000	Post-smolt (12 months)	Reduced feed intake, feed efficiency	Growth performance	4000	2000	Bernhoft et al.	2018	Food and Chemical Toxicology	Effects of dietary deoxynivalenol or ochratoxin A on performance and selected health indices in Atlantic salmon (Salmo salar)
Atlantic salmon (Salmo salar)	DON	in-vivo	56	Pure	Feed	0, 500, 1000, 2000, 4000, 6000	Post-smolt (12 months)	Reduced weight gain, body length, increased relative liver weight	Growth performance	6000	4000	Bernhoft et al.	2018	Food and Chemical Toxicology	Effects of dietary deoxynivalenol or ochratoxin A on performance and selected health indices in Atlantic salmon (Salmo salar)
Atlantic salmon (Salmo salar)	DON	in-vivo	56	Pure	Feed	0, 500, 1000, 2000, 4000, 6000	Post-smolt (12 months)	Reduced condition factor	Growth performance	4000	2000	Bernhoft et al.	2018	Food and Chemical Toxicology	Effects of dietary deoxynivalenol or ochratoxin A on performance and selected health indices in Atlantic salmon (Salmo salar)
Atlantic salmon (Salmo salar)	DON	in-vivo	56	Pure	Feed	0, 500, 1000, 2000, 4000, 6000	Post-smolt (12 months)	Reduced triglycerides	Biochemical parameters	1000	500	Bernhoft et al.	2018	Food and Chemical Toxicology	Effects of dietary deoxynivalenol or ochratoxin A on performance and selected health indices in Atlantic salmon (Salmo salar)
Atlantic salmon (Salmo salar)	DON	in-vivo	56	Pure	Feed	0, 500, 1000, 2000, 4000, 6000	Post-smolt (12 months)	Reduced cholesterol, total proteins and albumin, bile acids, lower packed cell volume	Biochemical parameters	2000	1000	Bernhoft et al.	2018	Food and Chemical Toxicology	Effects of dietary deoxynivalenol or ochratoxin A on performance and selected health indices in Atlantic salmon (Salmo salar)
Atlantic salmon (Salmo salar)	DON	in-vivo	56	Pure	Feed	0, 500, 1000, 2000, 4000, 6000	Post-smolt (12 months)	Reduced alkaline phosphatase	Biochemical parameters	6000	4000	Bernhoft et al.	2018	Food and Chemical Toxicology	Effects of dietary deoxynivalenol or ochratoxin A on performance and selected health indices in Atlantic salmon (Salmo salar)
Atlantic salmon (Salmo salar)	DON	in-vivo	56	Pure	Feed	0, 5500	12-month-old salmon	Reduced feed intake, weight gain, feed efficiency	Growth performance	5500	0	Moldal et al.	2018	Toxins	Dietary Deoxynivalenol (DON) May Impair the Epithelial Barrier and Modulate the Cytokine Signaling in the Intestine of Atlantic Salmon (Salmo salar)
Atlantic salmon (Salmo salar)	DON	in-vivo	56	Pure	Feed	0, 5500	12-month-old salmon	Lower relative expression of tight junction proteins: claudin 25b and tricellulin (mid- and distal intestine), occludin (pyloric caeca, mid- and distal intestine )	Intestinal integrity	5500	0	Moldal et al.	2018	Toxins	Dietary Deoxynivalenol (DON) May Impair the Epithelial Barrier and Modulate the Cytokine Signaling in the Intestine of Atlantic Salmon (Salmo salar)
Atlantic salmon (Salmo salar)	DON	in-vivo	56	Pure	Feed	0, 5500	12-month-old salmon	Increased relative expression of proliferating cell nuclear antigen (PCNA) in the intestine (pyloric caeca, mid- and distal intestine)	Immunity	5500	0	Moldal et al.	2018	Toxins	Dietary Deoxynivalenol (DON) May Impair the Epithelial Barrier and Modulate the Cytokine Signaling in the Intestine of Atlantic Salmon (Salmo salar)
Atlantic salmon (Salmo salar)	DON	in-vivo	56	Pure	Feed	0, 5500	12-month-old salmon	Increased relative expression of suppressors of cytokine signalling; SOCS1 (pyloric caeca and distal intestine) and SOCS2 (distal intestine)	Immunity	5500	0	Moldal et al.	2018	Toxins	Dietary Deoxynivalenol (DON) May Impair the Epithelial Barrier and Modulate the Cytokine Signaling in the Intestine of Atlantic Salmon (Salmo salar)
Rainbow trout (Oncorhynchus mykiss)	DON	in-vivo	56	Natural	Feed	300, 800, 1400, 2000, 2600	Juvenile trout	Reduced feed intake, weight gain, thermal-unit growth coefficient (TGC)	Growth performance	800	300	Hooft et al.	2011	Aquaculture	Rainbow trout (Oncorhynchus mykiss) is extremely sensitive to the feed-borne Fusarium mycotoxin deoxynivalenol (DON)
Rainbow trout (Oncorhynchus mykiss)	DON	in-vivo	56	Natural	Feed	300, 800, 1400, 2000, 2600	Juvenile trout	Reduced feed efficiency	Growth performance	2600	2000	Hooft et al.	2011	Aquaculture	Rainbow trout (Oncorhynchus mykiss) is extremely sensitive to the feed-borne Fusarium mycotoxin deoxynivalenol (DON)
Rainbow trout (Oncorhynchus mykiss)	DON	in-vivo	56	Natural	Feed	300, 800, 1400, 2000, 2600	Juvenile trout	Reduced retained nitrogen, recovered energy, nitrogen retention efficiency, energy retention efficiency	Nitrogen and Energy balances	1400	800	Hooft et al.	2011	Aquaculture	Rainbow trout (Oncorhynchus mykiss) is extremely sensitive to the feed-borne Fusarium mycotoxin deoxynivalenol (DON)
Rainbow trout (Oncorhynchus mykiss)	DON	in-vivo	56	Natural	Feed	300, 800, 1400, 2000, 2600	Juvenile trout	Reduced crude protein body content	Carcass composition	2600	2000	Hooft et al.	2011	Aquaculture	Rainbow trout (Oncorhynchus mykiss) is extremely sensitive to the feed-borne Fusarium mycotoxin deoxynivalenol (DON)
Rainbow trout (Oncorhynchus mykiss)	DON	in-vivo	56	Natural	Feed	300, 800, 1400, 2000, 2600	Juvenile trout	Congestion and subcapsular edema with a fibrinous network	Liver Histopathology	1400	800	Hooft et al.	2011	Aquaculture	Rainbow trout (Oncorhynchus mykiss) is extremely sensitive to the feed-borne Fusarium mycotoxin deoxynivalenol (DON)
Rainbow trout (Oncorhynchus mykiss)	DON	in-vivo	56	Natural	Feed	300, 800, 1400, 2000, 2600	Juvenile trout	Multifocal areas fatty infiltration, phenotypically altered hepatocytes (pyknosis and karyolysis)	Liver Histopathology	2600	1400	Hooft et al.	2011	Aquaculture	Rainbow trout (Oncorhynchus mykiss) is extremely sensitive to the feed-borne Fusarium mycotoxin deoxynivalenol (DON)
Rainbow trout (Oncorhynchus mykiss)	*DON	in-vivo	84	Natural	Feed	300, 1000, 1500, 2000	Trout fingerlings	Reduced feed intake, weight gain, thermal-unit growth coefficient (TGC)	Growth performance	1000	300	Hooft et al.	2017	Aquaculture	Evaluation of the efficacy of a commercial feed additive against the adverse effects of feed-borne deoxynivalenol (DON) on the performance of rainbow trout (Oncorhynchus mykiss)
Rainbow trout (Oncorhynchus mykiss)	*DON	in-vivo	84	Natural	Feed	300, 1000, 1500, 2000	Trout fingerlings	Reduced nitrogen retention efficiency	Nitrogen and Energy balances	1000	300	Hooft et al.	2017	Aquaculture	Evaluation of the efficacy of a commercial feed additive against the adverse effects of feed-borne deoxynivalenol (DON) on the performance of rainbow trout (Oncorhynchus mykiss)
Rainbow trout (Oncorhynchus mykiss)	*DON	in-vivo	84	Natural	Feed	300, 1000, 1500, 2000	Trout fingerlings	Reduced retained nitrogen	Nitrogen and Energy balances	1500	1000	Hooft et al.	2017	Aquaculture	Evaluation of the efficacy of a commercial feed additive against the adverse effects of feed-borne deoxynivalenol (DON) on the performance of rainbow trout (Oncorhynchus mykiss)
Rainbow trout (Oncorhynchus mykiss)	*DON	in-vivo	84	Natural	Feed	300, 1000, 1500, 2000	Trout fingerlings	Reduced recovered energy, energy retention efficiency	Nitrogen and Energy balances	2000	1500	Hooft et al.	2017	Aquaculture	Evaluation of the efficacy of a commercial feed additive against the adverse effects of feed-borne deoxynivalenol (DON) on the performance of rainbow trout (Oncorhynchus mykiss)
Rainbow trout (Oncorhynchus mykiss)	*DON	in-vivo	84	Natural	Feed	300, 1000, 1500, 2000	Trout fingerlings	Reduced protein, lipid, ash and GE body content and increased whole body water content	Carcass composition	2000	1500	Hooft et al.	2017	Aquaculture	Evaluation of the efficacy of a commercial feed additive against the adverse effects of feed-borne deoxynivalenol (DON) on the performance of rainbow trout (Oncorhynchus mykiss)
Rainbow trout (Oncorhynchus mykiss)	DON	in-vivo	56	Pure	Feed	0, 700, 1400, 2100	Juvenile trout	Reduced feed intake, weight gain, thermal unit growth coefficient (TGC)	Growth performance	1400	700	Hooft et al.	2019a	Aquaculture	The effects of naturally occurring or purified deoxynivalenol (DON) on growth performance, nutrient utilization and histopathology of rainbow trout (Oncorhynchus mykiss)
Rainbow trout (Oncorhynchus mykiss)	DON	in-vivo	56	Pure	Feed	0, 700, 1400, 2100	Juvenile trout	Reduced retained nitrogen (RN), recovered energy (RE) and nitrogen retention eﬃciency (NRE)	Nitrogen and Energy balances	1400	700	Hooft et al.	2019a	Aquaculture	The effects of naturally occurring or purified deoxynivalenol (DON) on growth performance, nutrient utilization and histopathology of rainbow trout (Oncorhynchus mykiss)
Rainbow trout (Oncorhynchus mykiss)	DON	in-vivo	56	Pure	Feed	0, 700, 1400, 2100	Juvenile trout	Reduced crude protein body content	Carcass composition	2100	1400	Hooft et al.	2019a	Aquaculture	The effects of naturally occurring or purified deoxynivalenol (DON) on growth performance, nutrient utilization and histopathology of rainbow trout (Oncorhynchus mykiss)
Rainbow trout (Oncorhynchus mykiss)	DON	in-vivo	56	Pure	Feed	0, 700, 1400, 2100	Juvenile trout	Increase in dead (apoptotic/necrotic) cells in the pyloric caeca	Gut Histopathology	2100	1400	Hooft et al.	2019a	Aquaculture	The effects of naturally occurring or purified deoxynivalenol (DON) on growth performance, nutrient utilization and histopathology of rainbow trout (Oncorhynchus mykiss)
Rainbow trout (Oncorhynchus mykiss)	*DON	in-vivo	56	Natural	Feed	0, 2100, 4100, 5900	Juvenile trout	Reduced feed intake, weight gain, thermal unit growth coefficient (TGC), feed eﬃciency (FE)	Growth performance	2100	0	Hooft et al.	2019a	Aquaculture	The effects of naturally occurring or purified deoxynivalenol (DON) on growth performance, nutrient utilization and histopathology of rainbow trout (Oncorhynchus mykiss)
Rainbow trout (Oncorhynchus mykiss)	*DON	in-vivo	56	Natural	Feed	0, 2100, 4100, 5900	Juvenile trout	Reduced retained nitrogen (RN), recovered energy (RE), nitrogen retention eﬃciency (NRE) and energy retention eﬃciency (ERE)	Nitrogen and Energy balances	2100	0	Hooft et al.	2019a	Aquaculture	The effects of naturally occurring or purified deoxynivalenol (DON) on growth performance, nutrient utilization and histopathology of rainbow trout (Oncorhynchus mykiss)
Rainbow trout (Oncorhynchus mykiss)	*DON	in-vivo	56	Natural	Feed	0, 2100, 4100, 5900	Juvenile trout	Reduced crude protein	Carcass composition	2100	0	Hooft et al.	2019a	Aquaculture	The effects of naturally occurring or purified deoxynivalenol (DON) on growth performance, nutrient utilization and histopathology of rainbow trout (Oncorhynchus mykiss)
Rainbow trout (Oncorhynchus mykiss)	*DON	in-vivo	56	Natural	Feed	0, 2100, 4100, 5900	Juvenile trout	Reduced lipid and GE body content, and increased water body content	Carcass composition	4100	2100	Hooft et al.	2019a	Aquaculture	The effects of naturally occurring or purified deoxynivalenol (DON) on growth performance, nutrient utilization and histopathology of rainbow trout (Oncorhynchus mykiss)
Rainbow trout (Oncorhynchus mykiss)	*DON	in-vivo	56	Natural	Feed	0, 2100, 4100, 5900	Juvenile trout	Increase in dead (apoptotic/necrotic) cells in the pyloric caeca	Gut Histopathology	5900	4100	Hooft et al.	2019a	Aquaculture	The effects of naturally occurring or purified deoxynivalenol (DON) on growth performance, nutrient utilization and histopathology of rainbow trout (Oncorhynchus mykiss)
Rainbow trout (Oncorhynchus mykiss)	*DON	in-vivo	56	Natural	Feed	0, 2100, 4100, 5900	Juvenile trout	Decrease in mitotic cells in the pyloric caeca and liver	Gut & Liver Histopathology	2100	0	Hooft et al.	2019a	Aquaculture	The effects of naturally occurring or purified deoxynivalenol (DON) on growth performance, nutrient utilization and histopathology of rainbow trout (Oncorhynchus mykiss)
Rainbow trout (Oncorhynchus mykiss)	*DON	in-vivo	70	Natural	Feed -low starch (12%)	100, 700, 1300	Juvenile trout	Reduced feed intake, weight gain, thermal-unit growth coefficient (TGC), feed efficiency	Growth performance	1300	700	Hooft et al.	2019b	Aquaculture	A comparative investigation of the effects of feed-borne deoxynivalenol (DON) on growth performance, nutrient utilization and metabolism of detoxification in rainbow trout (Oncorhynchus mykiss) and Nile tilapia (Oreochromis niloticus) fed diets containing different levels of digestible carbohydrates
Rainbow trout (Oncorhynchus mykiss)	*DON	in-vivo	70	Natural	Feed -low starch (12%)	100, 700, 1300	Juvenile trout	Reduced retained nitrogen (RN), recovered energy (RE), nitrogen retention eﬃciency (NRE) and energy retention eﬃciency (ERE)	Nitrogen balances	1300	700	Hooft et al.	2019b	Aquaculture	A comparative investigation of the effects of feed-borne deoxynivalenol (DON) on growth performance, nutrient utilization and metabolism of detoxification in rainbow trout (Oncorhynchus mykiss) and Nile tilapia (Oreochromis niloticus) fed diets containing different levels of digestible carbohydrates
Rainbow trout (Oncorhynchus mykiss)	*DON	in-vivo	70	Natural	Feed -low starch (12%)	100, 700, 1300	Juvenile trout	Reduced crude protein body content	Carcass composition	1300	700	Hooft et al.	2019b	Aquaculture	A comparative investigation of the effects of feed-borne deoxynivalenol (DON) on growth performance, nutrient utilization and metabolism of detoxification in rainbow trout (Oncorhynchus mykiss) and Nile tilapia (Oreochromis niloticus) fed diets containing different levels of digestible carbohydrates
Rainbow trout (Oncorhynchus mykiss)	*DON	in-vivo	70	Natural	Feed -low starch (12%)	100, 700, 1300	Juvenile trout	Decreased hepatic uridine diphosphate glucuronosyltransferase (UDPGT) activity	Detoxification	700	100	Hooft et al.	2019b	Aquaculture	A comparative investigation of the effects of feed-borne deoxynivalenol (DON) on growth performance, nutrient utilization and metabolism of detoxification in rainbow trout (Oncorhynchus mykiss) and Nile tilapia (Oreochromis niloticus) fed diets containing different levels of digestible carbohydrates
Rainbow trout (Oncorhynchus mykiss)	*DON	in-vivo	70	Natural	Feed -high starch (24%)	100, 700, 1300	Juvenile trout	Reduced weight gain, thermal-unit growth coefficient (TGC)	Growth performance	700	100	Hooft et al.	2019b	Aquaculture	A comparative investigation of the effects of feed-borne deoxynivalenol (DON) on growth performance, nutrient utilization and metabolism of detoxification in rainbow trout (Oncorhynchus mykiss) and Nile tilapia (Oreochromis niloticus) fed diets containing different levels of digestible carbohydrates
Rainbow trout (Oncorhynchus mykiss)	*DON	in-vivo	70	Natural	Feed -high starch (24%)	100, 700, 1300	Juvenile trout	Reduced feed efficiency	Growth performance	1300	700	Hooft et al.	2019b	Aquaculture	A comparative investigation of the effects of feed-borne deoxynivalenol (DON) on growth performance, nutrient utilization and metabolism of detoxification in rainbow trout (Oncorhynchus mykiss) and Nile tilapia (Oreochromis niloticus) fed diets containing different levels of digestible carbohydrates
Rainbow trout (Oncorhynchus mykiss)	*DON	in-vivo	70	Natural	Feed -high starch (24%)	100, 700, 1300	Juvenile trout	Reduced retained nitrogen (RN), nitrogen retention eﬃciency (NRE)	Nitrogen balances	1300	700	Hooft et al.	2019b	Aquaculture	A comparative investigation of the effects of feed-borne deoxynivalenol (DON) on growth performance, nutrient utilization and metabolism of detoxification in rainbow trout (Oncorhynchus mykiss) and Nile tilapia (Oreochromis niloticus) fed diets containing different levels of digestible carbohydrates
Rainbow trout (Oncorhynchus mykiss)	*DON	in-vivo	70	Natural	Feed -high starch (24%)	100, 700, 1300	Juvenile trout	Reduced crude protein body content and increased lipid body content	Carcass composition	1300	700	Hooft et al.	2019b	Aquaculture	A comparative investigation of the effects of feed-borne deoxynivalenol (DON) on growth performance, nutrient utilization and metabolism of detoxification in rainbow trout (Oncorhynchus mykiss) and Nile tilapia (Oreochromis niloticus) fed diets containing different levels of digestible carbohydrates
Rainbow trout (Oncorhynchus mykiss)	*DON	in-vivo	70	Natural	Feed -high starch (24%)	100, 700, 1300	Juvenile trout	Increased hepatic uridine diphosphate glucuronosyltransferase (UDPGT) activity	Detoxification	1300	700	Hooft et al.	2019b	Aquaculture	A comparative investigation of the effects of feed-borne deoxynivalenol (DON) on growth performance, nutrient utilization and metabolism of detoxification in rainbow trout (Oncorhynchus mykiss) and Nile tilapia (Oreochromis niloticus) fed diets containing different levels of digestible carbohydrates
Rainbow trout (Oncorhynchus mykiss)	*DON	in-vivo	60	Pure	Feed	37, 4714, 11412	Fingerlings	Reduced feed intake, weight gain	Growth performance	4714	37	Gonçalves et al.	2018	Aquaculture	Impact of deoxynivalenol on rainbow trout: Growth performance, digestibility, key gene expression regulation and metabolism
Rainbow trout (Oncorhynchus mykiss)	*DON	in-vivo	60	Pure	Feed	37, 4714, 11412	Fingerlings	Reduced crude protein body content, increased ash body content	Carcass composition	4714	37	Gonçalves et al.	2018	Aquaculture	Impact of deoxynivalenol on rainbow trout: Growth performance, digestibility, key gene expression regulation and metabolism
Rainbow trout (Oncorhynchus mykiss)	*DON	in-vivo	60	Pure	Feed	37, 4714, 11412	Fingerlings	Reduced retention of protein, fat and energy	Nutrient balances	4714	37	Gonçalves et al.	2018	Aquaculture	Impact of deoxynivalenol on rainbow trout: Growth performance, digestibility, key gene expression regulation and metabolism
Rainbow trout (Oncorhynchus mykiss)	*DON	in-vivo	60	Pure	Feed	37, 4714, 11412	Fingerlings	Increased pepsin and lipase activity	Proteolytic enzyme activity	11412	4714	Gonçalves et al.	2018	Aquaculture	Impact of deoxynivalenol on rainbow trout: Growth performance, digestibility, key gene expression regulation and metabolism
Rainbow trout (Oncorhynchus mykiss)	*DON	in-vivo	60	Pure	Feed	37, 4714, 11412	Fingerlings	Down-regulation of growth control genes in liver (igf1,igf2) and up-regulation of (adcyap1a) in the brain	Expression of genes related growth control	4714	37	Gonçalves et al.	2018	Aquaculture	Impact of deoxynivalenol on rainbow trout: Growth performance, digestibility, key gene expression regulation and metabolism
Rainbow trout (Oncorhynchus mykiss)	*DON	in-vivo	60	Pure	Feed	37, 4714, 11412	Fingerlings	Up-regulation of appetite control and regulation genes (npy) in the brain	Expression of genes related to appetite control and regulation	4714	37	Gonçalves et al.	2018	Aquaculture	Impact of deoxynivalenol on rainbow trout: Growth performance, digestibility, key gene expression regulation and metabolism
Rainbow trout (Oncorhynchus mykiss)	*DON	in-vivo	60	Pure	Feed	37, 4714, 11412	Fingerlings	Up-regulation of the trypsinogen 3 precursor (try3) in the gut	Expression of genes related to enzymatic digestion	4714	37	Gonçalves et al.	2018	Aquaculture	Impact of deoxynivalenol on rainbow trout: Growth performance, digestibility, key gene expression regulation and metabolism
Rainbow trout (Oncorhynchus mykiss)	*DON	in-vivo	50	Pure	Feed	0, 1166, 2745	Fingerlings	Reduced feed intake, weight gain	Growth performance	2745	1166	Gonçalves et al.	2019	Journal of the World Aquaculture Society	Effects of deoxynivalenol exposure time and contamination levels on rainbow trout
Rainbow trout (Oncorhynchus mykiss)	*DON	in-vivo	50	Pure	Feed	0, 1166, 2745	Fingerlings	Reduced condition factor	Growth performance	1166	0	Gonçalves et al.	2019	Journal of the World Aquaculture Society	Effects of deoxynivalenol exposure time and contamination levels on rainbow trout
Rainbow trout (Oncorhynchus mykiss)	*DON	in-vivo	50	Pure	Feed	0, 1166, 2745	Fingerlings	Vacuolation of hepatocytes, necrosis with scattered hemorrhages	Liver Histopathology	2745	1166	Gonçalves et al.	2019	Journal of the World Aquaculture Society	Effects of deoxynivalenol exposure time and contamination levels on rainbow trout
Rainbow trout (Oncorhynchus mykiss)	*DON	in-vivo	50	Pure	Feed	0, 1166, 2745	Fingerlings	Hyalinized hepatocytes	Liver Histopathology	1166	0	Gonçalves et al.	2019	Journal of the World Aquaculture Society	Effects of deoxynivalenol exposure time and contamination levels on rainbow trout
Rainbow trout (Oncorhynchus mykiss)	*DON	in-vivo	50	Pure	Feed	0, 1166, 2745	Fingerlings	Increased activities of alanine transaminase (ALT) and aminotransferase (AST) in the serum	Enzyme activities	2745	1166
Rainbow trout (Oncorhynchus mykiss)	*DON	in-vivo	28	Natural	Feed	500, 4100, 5900	Fingerlings	Reduction of feed intake	Growth performance	4100	500	Ryerse et al.	2016	Aquaculture Research	Diets containing corn naturally contaminated with deoxynivalenol reduces the susceptibility of rainbow trout (Oncorhynchus mykiss) to experimental Flavobacterium psychrophilum infection
Rainbow trout (Oncorhynchus mykiss)	*DON	in-vivo	28	Natural	Feed	500, 4100, 5900	Fingerlings	Reduced mortality in DON-treated and control pair-fed fish after bacterial challenge	Mortality	4100	500	Ryerse et al.	2016	Aquaculture Research	Diets containing corn naturally contaminated with deoxynivalenol reduces the susceptibility of rainbow trout (Oncorhynchus mykiss) to experimental Flavobacterium psychrophilum infection
Rainbow trout (Oncorhynchus mykiss)	*DON	in-vivo	23	**Pure	Feed	225, 1964	Adult	Reduced glucose, cholesterol and ammonia	Plasma biochemical	1964	225	Matejova et al.	2014	BioMed Research International	The effect of mycotoxin deoxynivalenol on haematological and biochemical indicators and histopathological changes in rainbow trout (Oncorhynchus mykiss)
Rainbow trout (Oncorhynchus mykiss)	*DON	in-vivo	23	**Pure	Feed	225, 1964	Adult	Reduced erythrocyte haemoglobin (MCH)	Haematological indices	1964	225	Matejova et al.	2014	BioMed Research International	The effect of mycotoxin deoxynivalenol on haematological and biochemical indicators and histopathological changes in rainbow trout (Oncorhynchus mykiss)
Rainbow trout (Oncorhynchus mykiss)	*DON	in-vivo	23	**Pure	Feed	225, 1964	Adult	Severe hyaline droplet degeneration in the tubular epithelial cells of the caudal kidney in 9 out of 10 fish	Kidney Histopathology	1964	225	Matejova et al.	2014	BioMed Research International	The effect of mycotoxin deoxynivalenol on haematological and biochemical indicators and histopathological changes in rainbow trout (Oncorhynchus mykiss)
Rainbow trout (Oncorhynchus mykiss)	*DON	in-vivo	23	**Pure	Feed	225, 1964	Adult	Increased level of pro-inflammatory cytokine TNF-α in the head kidney	Immune system	1964	225	Matejova et al.	2015	Veterinarni Medicina	Effect of the mycotoxin deoxynivalenol on the immune responses of rainbow trout (Oncorhynchus mykiss)
Rainbow trout (Oncorhynchus mykiss)	*DON	in-vivo	23	**Pure	Feed	225, 1964	Adult	Decreased catalase (CAT) activity in liver and kidney, and increased glutathione reductase (GR) activity in kidney	Oxidative stress	1964	225	Šišperová	2015	Journal of Applied Ichthyology	The effect of mycotoxin deoxynivalenol (DON) on the oxidative stress markers in rainbow trout (Oncorhynchus mykiss, Walbaum 1792)
Rainbow trout (Oncorhynchus mykiss)	*DON	in-vivo	32	**Pure	Feed	225, 1964	Adult	Decreased catalase (CAT) activity in kidney, decreased glutathione reductase (GR) activity in gills and kidney, decreased glutathione peroxidase (GPx) activity in kidney, increas in glutathione S-transferase (GST) activity in the liver and decrease in the gills	Oxidative stress	1964	225	Šišperová	2015	Journal of Applied Ichthyology	The effect of mycotoxin deoxynivalenol (DON) on the oxidative stress markers in rainbow trout (Oncorhynchus mykiss, Walbaum 1792)
Rainbow trout (Oncorhynchus mykiss)	*DON	in-vivo	28	**Pure	Feed	100, 3100, 6400	Fingerlings	Reduced feed intake	Growth performance	3100	100	Ryerse et al.	2015	Jounal of Fish Diseases	Purified deoxynivalenol or feed restriction reduces mortality in rainbow trout, O ncorhynchus mykiss (Walbaum), with experimental bacterial coldwater disease but biologically relevant concentrations of deoxynivalenol do not impair the growth of F lavobacterium psychrophilum
Rainbow trout (Oncorhynchus mykiss)	*DON	in-vivo	28	**Pure	Feed	100, 3100, 6400	Fingerlings	Reduced mortality in high DON-treated fish after bacterial challenge	Mortality	6400	3100	Ryerse et al.	2015	Jounal of Fish Diseases	Purified deoxynivalenol or feed restriction reduces mortality in rainbow trout, O ncorhynchus mykiss (Walbaum), with experimental bacterial coldwater disease but biologically relevant concentrations of deoxynivalenol do not impair the growth of F lavobacterium psychrophilum
Rainbow trout (Oncorhynchus mykiss)	*DON	in-vivo	21	**Pure	Feed	100, 3100, 6400	Fingerlings	Reduced granulocytes ratio	Hematological parameters	3100	100	Ryerse et al.	2015	Jounal of Fish Diseases	Purified deoxynivalenol or feed restriction reduces mortality in rainbow trout, O ncorhynchus mykiss (Walbaum), with experimental bacterial coldwater disease but biologically relevant concentrations of deoxynivalenol do not impair the growth of F lavobacterium psychrophilum
Rainbow trout (Oncorhynchus mykiss)	*DON	in-vivo	28	**Natural/Pure	Feed	100, 3300, 3800	Juveniles	Reduced feed intake, weight gain	Growth performance	3300	100	Ryerse et al.	2015	Jounal of Fish Diseases	Purified deoxynivalenol or feed restriction reduces mortality in rainbow trout, O ncorhynchus mykiss (Walbaum), with experimental bacterial coldwater disease but biologically relevant concentrations of deoxynivalenol do not impair the growth of F lavobacterium psychrophilum
Rainbow trout (Oncorhynchus mykiss)	*DON	in-vivo	35	**Natural/Pure	Feed	100, 3300, 3800	Juveniles	Respiratory burst of head-kidney leucocytes significantly higher	Immune system	3300	100	Ryerse et al.	2015	Jounal of Fish Diseases	Purified deoxynivalenol or feed restriction reduces mortality in rainbow trout, O ncorhynchus mykiss (Walbaum), with experimental bacterial coldwater disease but biologically relevant concentrations of deoxynivalenol do not impair the growth of F lavobacterium psychrophilum
Rainbow trout (Oncorhynchus mykiss)	DON*	in-vivo	28	Artificially contaminated corn	Feed	0, 1000 to 13000	Fry	Reduced feed intake, weight gain, feed efficiency	Growth performance	1000	0	Woodward et al.	1983	Aquaculture	VOMITOXIN IN DIETS FOR RAINBOW TROUT (SALMO GAIRDNERI)
Carp (Cyprinus carpio L.)	DON	in-vivo	28	Pure	Feed	0, 352, 619, 953	Juveniles	Increased lipid and energy body content	Carcass composition	619	352	Pietsch et al.	2014a	Toxins	Organ Damage and Hepatic Lipid Accumulation in Carp (Cyprinus carpio L.) after Feed-Borne Exposure to the Mycotoxin, Deoxynivalenol (DON)
Carp (Cyprinus carpio L.)	DON	in-vivo	28	Pure	Feed	0, 352, 619, 953	Juveniles	Increased lipid peroxidation in head kidney, trunk kidney spleen and liver	Oxidative stress	953	619	Pietsch et al.	2014a	Toxins	Organ Damage and Hepatic Lipid Accumulation in Carp (Cyprinus carpio L.) after Feed-Borne Exposure to the Mycotoxin, Deoxynivalenol (DON)
Carp (Cyprinus carpio L.)	DON	in-vivo	28	Pure	Feed	0, 352, 619, 953	Juveniles	Increased lactate dehydrogenase (LDH) activity in head and trunk kidney	Anaerobic metabolism	352	0	Pietsch et al.	2014a	Toxins	Organ Damage and Hepatic Lipid Accumulation in Carp (Cyprinus carpio L.) after Feed-Borne Exposure to the Mycotoxin, Deoxynivalenol (DON)
Carp (Cyprinus carpio L.)	DON	in-vivo	28	Pure	Feed	0, 352, 619, 953	Juveniles	Decreased lactate dehydrogenase (LDH) activity in muscle	Anaerobic metabolism	953	619	Pietsch et al.	2014a	Toxins	Organ Damage and Hepatic Lipid Accumulation in Carp (Cyprinus carpio L.) after Feed-Borne Exposure to the Mycotoxin, Deoxynivalenol (DON)
Carp (Cyprinus carpio L.)	DON	in-vivo	28	Pure	Feed	0, 352, 619, 953	Juveniles	Increased lactate dehydrogenase (LDH) in serum	Anaerobic metabolism	953	619	Pietsch et al.	2014a	Toxins	Organ Damage and Hepatic Lipid Accumulation in Carp (Cyprinus carpio L.) after Feed-Borne Exposure to the Mycotoxin, Deoxynivalenol (DON)
Carp (Cyprinus carpio L.)	DON	in-vivo	28	Pure	Feed	0, 352, 619, 953	Juveniles	Increased liver damage (heperemia, dilation of sinusoids)	Liver Histopathology	352	0	Pietsch et al.	2014a	Toxins	Organ Damage and Hepatic Lipid Accumulation in Carp (Cyprinus carpio L.) after Feed-Borne Exposure to the Mycotoxin, Deoxynivalenol (DON)
Carp (Cyprinus carpio L.)	DON	in-vivo	28	Pure	Feed	0, 352, 619, 953	Juveniles	Increased liver damage (fat aggregation)	Liver Histopathology	619	352	Pietsch et al.	2014a	Toxins	Organ Damage and Hepatic Lipid Accumulation in Carp (Cyprinus carpio L.) after Feed-Borne Exposure to the Mycotoxin, Deoxynivalenol (DON)
Carp (Cyprinus carpio L.)	DON	in-vivo	28	Pure	Feed	0, 352, 619, 953	Juveniles	Increased alanine aminotransferase (ALT) in liver	Biochemical composition of liver	619	352	Pietsch et al.	2014a	Toxins	Organ Damage and Hepatic Lipid Accumulation in Carp (Cyprinus carpio L.) after Feed-Borne Exposure to the Mycotoxin, Deoxynivalenol (DON)
Carp (Cyprinus carpio L.)	DON	in-vivo	28	Pure	Feed	0, 352, 619, 953	Juveniles	Increased lactate; reduced sorbitol dehydrogenase (SDH) and alanine aminotransferase (ALT) in serum	Biochemical of serum	953	619	Pietsch et al.	2014a	Toxins	Organ Damage and Hepatic Lipid Accumulation in Carp (Cyprinus carpio L.) after Feed-Borne Exposure to the Mycotoxin, Deoxynivalenol (DON)
Carp (Cyprinus carpio L.)	DON	in-vivo	28	Pure	Feed	0, 352, 619, 953	Juveniles	Reduced aspartate aminotransferase (AST) and albumin in serum	Biochemical of serum	619	352	Pietsch et al.	2014a	Toxins	Organ Damage and Hepatic Lipid Accumulation in Carp (Cyprinus carpio L.) after Feed-Borne Exposure to the Mycotoxin, Deoxynivalenol (DON)
Carp (Cyprinus carpio L.)	DON	in-vivo	28	Pure	Feed	0, 352, 619, 953	Juveniles	Reduced erythrocyte length	Blood parameters	352	0	Pietsch et al.	2014b	Food and Chemical Toxicology	In vivo effects of deoxynivalenol (DON) on innate immune responses of carp (Cyprinus carpio L.)
Carp (Cyprinus carpio L.)	DON	in-vivo	28	Pure	Feed	0, 352, 619, 953	Juveniles	Reduced cell viability of un-/bacterial lipopolysaccharide (LPS)-stimulated leucocytes in head kidney cultured in vitro for 96h	Cytotoxicity	352	0	Pietsch et al.	2014b	Food and Chemical Toxicology	In vivo effects of deoxynivalenol (DON) on innate immune responses of carp (Cyprinus carpio L.)
Carp (Cyprinus carpio L.)	DON	in-vivo	28	Pure	Feed	0, 352, 619, 953	Juveniles	Increased activity of antioxidative enzyme, catalase (CAT) in erythrocytes	Oxidative stress	352	0	Pietsch et al.	2014b	Food and Chemical Toxicology	In vivo effects of deoxynivalenol (DON) on innate immune responses of carp (Cyprinus carpio L.)
Carp (Cyprinus carpio L.)	DON	in-vivo	28	Pure	Feed	0, 352, 619, 953	Juveniles	Reduced respiratory burst (ROS) after 24 h of in vitro culture of trunk kidney cells (of fish with additional two weeks recovery) stimulated by phorbol myristate acetate (PMA)	Immunity	619	352	Pietsch et al.	2014b	Food and Chemical Toxicology	In vivo effects of deoxynivalenol (DON) on innate immune responses of carp (Cyprinus carpio L.)
Carp (Cyprinus carpio L.)	DON	in-vivo	28	Pure	Feed	0, 352, 619, 953	Juveniles	Reduced respiratory burst (ROS) after 24 h of in vitro culture of head kidney cells un-/stimulated by phorbol myristate acetate (PMA)	Immunity	352	0	Pietsch et al.	2014b	Food and Chemical Toxicology	In vivo effects of deoxynivalenol (DON) on innate immune responses of carp (Cyprinus carpio L.)
Carp (Cyprinus carpio L.)	DON	in-vivo	28	Pure	Feed	0, 352, 619, 953	Juveniles	Reduced nitrite production (NO) in trunk kidney cells ex vivo incubated with LPS for 96 h	Immunity	953	619	Pietsch et al.	2014b	Food and Chemical Toxicology	In vivo effects of deoxynivalenol (DON) on innate immune responses of carp (Cyprinus carpio L.)
Carp (Cyprinus carpio L.)	DON	in-vivo	28	Pure	Feed	0, 352, 619, 953	Juveniles	Reduced nitrite production (NO) in isolated leukocytes from head kidney ex vivo incubated with LPS for 96 h	Immunity	619	352	Pietsch et al.	2014b	Food and Chemical Toxicology	In vivo effects of deoxynivalenol (DON) on innate immune responses of carp (Cyprinus carpio L.)
Carp (Cyprinus carpio L.)	DON	in-vivo	7	Pure	Feed	0, 953	Juveniles	Increased thrombocyte numbers	Blood parameters	953	0	Pietsch et al.	2015a	Mycotoxin Research	Acute and subchronic effects on immune responses of carp (Cyprinus carpio L.) after exposure to deoxynivalenol (DON) in feed
Carp (Cyprinus carpio L.)	DON	in-vivo	14	Pure	Feed	0, 953	Juveniles	Decreased lymphocytes, increased monocytes and granulocytes	Blood parameters	953	0	Pietsch et al.	2015a	Mycotoxin Research	Acute and subchronic effects on immune responses of carp (Cyprinus carpio L.) after exposure to deoxynivalenol (DON) in feed
Carp (Cyprinus carpio L.)	DON	in-vivo	14	Pure	Feed	0, 953	Juveniles	Increased relative mRNA expression: of arginase 2 (arg-2) in head- and trunk kidney, arginase 1 (arg-1), arginase 2 (arg-2), tumor necrosis factor alpha (tnfα), interferon-gamma (ifnγ), interleukin-8 (il-8), interleukin-10 (il-10) and inducible nitric oxide synthases (inos) in spleen, arginase 1 (arg-1), arginase 2 (arg-2) interleukin-8 (il-8), interleukin-10 (il-10) in liver, arginase 1 (arg-1),…	Immunity	953	0	Pietsch et al.	2015a	Mycotoxin Research	Acute and subchronic effects on immune responses of carp (Cyprinus carpio L.) after exposure to deoxynivalenol (DON) in feed
Carp (Cyprinus carpio L.)	DON	in-vivo	26	Pure	Feed	0, 953	Juveniles	Increased relative mRNA expression: arginase 1 (arg-1), tumor necrosis factor alpha (tnfα), interferon-gamma (ifnγ) and interleukin-8 (il-8) in trunk kidney	Immunity	953	0	Pietsch et al.	2015a	Mycotoxin Research	Acute and subchronic effects on immune responses of carp (Cyprinus carpio L.) after exposure to deoxynivalenol (DON) in feed
Carp (Cyprinus carpio L.)	DON	in-vivo	56	Pure	Feed	0, 953	Juveniles	Increased relative mRNA expression: arginase 1 (arg-1) and arginase 2 (arg-2) in trunk kidney	Immunity	953	0	Pietsch et al.	2015a	Mycotoxin Research	Acute and subchronic effects on immune responses of carp (Cyprinus carpio L.) after exposure to deoxynivalenol (DON) in feed
Carp (Cyprinus carpio L.)	DON	in-vivo	26	Pure	Feed	0, 953	Juveniles	Increased arginase activity in head kidney leucocytes	Immunity	953	0	Pietsch et al.	2015a	Mycotoxin Research	Acute and subchronic effects on immune responses of carp (Cyprinus carpio L.) after exposure to deoxynivalenol (DON) in feed
Carp (Cyprinus carpio L.)	DON	in-vivo	7	Pure	Feed	0, 953	Juveniles	Reduced production of reactive oxygen intermediates (ROS) by immune cells from trunk kidney	Immunity	953	0	Pietsch et al.	2015a	Mycotoxin Research	Acute and subchronic effects on immune responses of carp (Cyprinus carpio L.) after exposure to deoxynivalenol (DON) in feed
Carp (Cyprinus carpio L.)	DON	in-vivo	14	Pure	Feed	0, 953	Juveniles	Increased NO production in trunk kidney leucocytes in presence of LPS	Immunity	953	0	Pietsch et al.	2015a	Mycotoxin Research	Acute and subchronic effects on immune responses of carp (Cyprinus carpio L.) after exposure to deoxynivalenol (DON) in feed
Carp (Cyprinus carpio L.)	DON	in-vivo	56	Pure	Feed	0, 953	Juveniles	Reduced cell viability in leucocytes of trunk kidney after in vitro cultivation for 96 h with and without LPS	Immunity	953	0	Pietsch et al.	2015a	Mycotoxin Research	Acute and subchronic effects on immune responses of carp (Cyprinus carpio L.) after exposure to deoxynivalenol (DON) in feed
Carp (Cyprinus carpio L.)	DON	in-vivo	7	Pure	Feed	0, 953	Juveniles	Reduced activity of biotransformation enzymes: glutathione S-transferase (GST), pentoxyresorufin O-depentylase (PROD)	Liver enzyme activities	953	0	Pietsch et al.	2015b	World Mycotoxin Journal	Feed-borne exposure to deoxynivalenol leads to acute and chronic effects on liver enzymes and histology in carp
Carp (Cyprinus carpio L.)	DON	in-vivo	14	Pure	Feed	0, 953	Juveniles	Reduced activity of biotransformation enzymes: glutathione S-transferase (GST)	Liver enzyme activities	953	0	Pietsch et al.	2015b	World Mycotoxin Journal	Feed-borne exposure to deoxynivalenol leads to acute and chronic effects on liver enzymes and histology in carp
Carp (Cyprinus carpio L.)	DON	in-vivo	26	Pure	Feed	0, 953	Juveniles	Increased activity of metabolic enzyme: alanine aminotransferase (ALAT) , reduced activity of antioxidative enzyme; glutathione reductase (GSH-Red)	Liver enzyme activities	953	0	Pietsch et al.	2015b	World Mycotoxin Journal	Feed-borne exposure to deoxynivalenol leads to acute and chronic effects on liver enzymes and histology in carp
Carp (Cyprinus carpio L.)	DON	in-vivo	56	Pure	Feed	0, 953	Juveniles	Increased activity of metabolic enzyme: alanine aminotransferase (ALAT), reduced activity of biotransformation enzyme: glutathione S-transferase (GST), reduced activity of antioxidative enzyme: selenium-dependent glutathione peroxidase (Se-GPx) and superoxide dismutase (SOD)	Liver enzyme activities	953	0	Pietsch et al.	2015b	World Mycotoxin Journal	Feed-borne exposure to deoxynivalenol leads to acute and chronic effects on liver enzymes and histology in carp
Carp (Cyprinus carpio L.)	DON	in-vivo	14	Pure	Feed	0, 953	Juveniles	Increased hyperaemia, vacuolisation and dilation of sinusoids	Liver Histopathology	953	0	Pietsch et al.	2015b	World Mycotoxin Journal	Feed-borne exposure to deoxynivalenol leads to acute and chronic effects on liver enzymes and histology in carp
Carp (Cyprinus carpio L.)	DON	in-vivo	26	Pure	Feed	0, 953	Juveniles	Increased fat aggregations and dilation of sinusoids	Liver Histopathology	953	0	Pietsch et al.	2015b	World Mycotoxin Journal	Feed-borne exposure to deoxynivalenol leads to acute and chronic effects on liver enzymes and histology in carp
Grass carp (Ctenopharyngodon idella)	DON	in-vivo	60	Pure	Feed	27, 318, 636, 922, 1243 and 1515	Juveniles	Impaired growth performance and body malformation	Growth performance	636	318	Huang et al.	2018	Fish and Shellfish Immunology	Deoxynivalenol decreased the growth performance and impaired intestinal physical barrier in juvenile grass carp (Ctenopharyngodon idella)
Grass carp (Ctenopharyngodon idella)	DON	in-vivo	60	Pure	Feed	27, 318, 636, 922, 1243 and 1515	Juveniles	Edema in the lamina propria and necrosis of the epithelial cell	Gut Histology	636	318	Huang et al.	2018	Fish and Shellfish Immunology	Deoxynivalenol decreased the growth performance and impaired intestinal physical barrier in juvenile grass carp (Ctenopharyngodon idella)
Grass carp (Ctenopharyngodon idella)	DON	in-vivo	60	Pure	Feed	27, 318, 636, 922, 1243 and 1515	Juveniles	Increased the reactive oxygen species (ROS), malondialdehyde (MDA) and protein carbonyl (PC) content in the intestine	Oxidative stress	636	318	Huang et al.	2018	Fish and Shellfish Immunology	Deoxynivalenol decreased the growth performance and impaired intestinal physical barrier in juvenile grass carp (Ctenopharyngodon idella)
Grass carp (Ctenopharyngodon idella)	DON	in-vivo	60	Pure	Feed	27, 318, 636, 922, 1243 and 1515	Juveniles	Increased relative expression of Kelchlike-ECH-associated protein 1 (Keap1a) in the intestine	Oxidative stress	1243	922	Huang et al.	2018	Fish and Shellfish Immunology	Deoxynivalenol decreased the growth performance and impaired intestinal physical barrier in juvenile grass carp (Ctenopharyngodon idella)
Grass carp (Ctenopharyngodon idella)	DON	in-vivo	60	Pure	Feed	27, 318, 636, 922, 1243 and 1515	Juveniles	Decreased glutathione (GSH) content, reduced antioxidant enzymes activities in the intestine	Oxidative stress	318	27	Huang et al.	2018	Fish and Shellfish Immunology	Deoxynivalenol decreased the growth performance and impaired intestinal physical barrier in juvenile grass carp (Ctenopharyngodon idella)
Grass carp (Ctenopharyngodon idella)	DON	in-vivo	60	Pure	Feed	27, 318, 636, 922, 1243 and 1515	Juveniles	Down-regulated mRNA levels of antioxidant enzymes (except glutathione S-transferase rho (GSTR) in mid intestine) and NF-E2-related factor 2 (Nrf2), as well as the protein levels of Nrf2 in intestine	Oxidative stress	318	27	Huang et al.	2018	Fish and Shellfish Immunology	Deoxynivalenol decreased the growth performance and impaired intestinal physical barrier in juvenile grass carp (Ctenopharyngodon idella)
Grass carp (Ctenopharyngodon idella)	DON	in-vivo	60	Pure	Feed	27, 318, 636, 922, 1243 and 1515	Juveniles	Up-regulated cysteinyl aspartic acid-protease (caspase) -3, -7, -8, -9, apoptotic protease activating factor-1 (Apaf-1), Bcl2- associated X protein (Bax), Fas ligand (FasL) and c-Jun N-terminal protein kinase (JNK) mRNA levels in intestine; down-regulated B-cell lymphoma-2 (bcl-2) and myeloid cell leukemia-1 (Mcl-1) mRNA levels in intestine	Cell apoptosis	636	318	Huang et al.	2018	Fish and Shellfish Immunology	Deoxynivalenol decreased the growth performance and impaired intestinal physical barrier in juvenile grass carp (Ctenopharyngodon idella)
Grass carp (Ctenopharyngodon idella)	DON	in-vivo	60	Pure	Feed	27, 318, 636, 922, 1243 and 1515	Juveniles	Decreased ZO-1, ZO-2b, occludin, claudin-c, claudin-f, claudin-7a, claudin-7b and claudin-11 (except claudin-b and claudin-3c) mRNA levels in intestine	Gut integrity	318	27	Huang et al.	2018	Fish and Shellfish Immunology	Deoxynivalenol decreased the growth performance and impaired intestinal physical barrier in juvenile grass carp (Ctenopharyngodon idella)
Grass carp (Ctenopharyngodon idella)	DON	in-vivo	60	Pure	Feed	27, 318, 636, 922, 1243 and 1515	Juveniles	Decreased lysozyme (LZ) and acid phosphatase (ACP) activities, as well as complement 3 (C3), C4 and immunoglobulin M (IgM) content in the intestine	Immunity	636	318	Huang et al.	2019	Fish and Shellfish Immunology	Deoxynivalenol decreased intestinal immune function related to NF-κB and TOR signalling in juvenile grass carp (Ctenopharyngodon idella)
Grass carp (Ctenopharyngodon idella)	DON	in-vivo	60	Pure	Feed	27, 318, 636, 922, 1243 and 1515	Juveniles	Down-regulated mRNA levels of anti-microbial substance: liver expressed antimicrobial peptide (LEAP) -2A, LEAP-2B, hepcidin, β-defensin-1, and mucin2 in the intestine	Immunity	318	27	Huang et al.	2019	Fish and Shellfish Immunology	Deoxynivalenol decreased intestinal immune function related to NF-κB and TOR signalling in juvenile grass carp (Ctenopharyngodon idella)
Grass carp (Ctenopharyngodon idella)	DON	in-vivo	60	Pure	Feed	27, 318, 636, 922, 1243 and 1515	Juveniles	Up-regulated mRNA levels of pro-inflammatory cytokines [interleukin 1β (IL-1β), tumor necrosis factor α (TNF-α), interferon γ2 (INF-γ2), IL-6 (only in proximal intestine), IL-8, IL-12p35, IL-12p40, IL-15 and IL- 17D] in the intestine	Immunity	636	318	Huang et al.	2019	Fish and Shellfish Immunology	Deoxynivalenol decreased intestinal immune function related to NF-κB and TOR signalling in juvenile grass carp (Ctenopharyngodon idella)
Grass carp (Ctenopharyngodon idella)	DON	in-vivo	60	Pure	Feed	27, 318, 636, 922, 1243 and 1515	Juveniles	Down-regulated mRNA levels of anti-inflammatory cytokines [IL-10, IL-11, IL-4/13A (not IL-4/13B), transforming growth factor β1 (TGF-β1) (not TGF-β2)] in the intestine	Immunity	318	27	Huang et al.	2019	Fish and Shellfish Immunology	Deoxynivalenol decreased intestinal immune function related to NF-κB and TOR signalling in juvenile grass carp (Ctenopharyngodon idella)
Grass carp (Ctenopharyngodon idella)	DON	in-vivo	60	Pure	Feed	27, 318, 636, 922, 1243 and 1515	Juveniles	Injuries in gill tissue; edema, fusion of lamellar	Gills Histology	636	318	Huang et al.	2020	Toxicon	The toxic effects and potential mechanisms of deoxynivalenol on the structural integrity of fish gill: Oxidative damage, apoptosis and tight junctions disruption
Grass carp (Ctenopharyngodon idella)	DON	in-vivo	60	Pure	Feed	27, 318, 636, 922, 1243 and 1515	Juveniles	Injuries in gill tissue; fusion of lamellar and necrosis of epithelium	Gills Histology	1515	1243	Huang et al.	2020	Toxicon	The toxic effects and potential mechanisms of deoxynivalenol on the structural integrity of fish gill: Oxidative damage, apoptosis and tight junctions disruption
Grass carp (Ctenopharyngodon idella)	DON	in-vivo	60	Pure	Feed	27, 318, 636, 922, 1243 and 1515	Juveniles	Increased reactive oxygen species (ROS), protein carbonyl (PC) and malondialdehyde (MDA) in gills	Oxidative stress	636	318	Huang et al.	2020	Toxicon	The toxic effects and potential mechanisms of deoxynivalenol on the structural integrity of fish gill: Oxidative damage, apoptosis and tight junctions disruption
Grass carp (Ctenopharyngodon idella)	DON	in-vivo	60	Pure	Feed	27, 318, 636, 922, 1243 and 1515	Juveniles	Decreased anti-superoxide anion (ASA), anti-hydroxyl radical (AHR) and total antioxidant capacity (T-AOC) in gills	Oxidative stress	318	27	Huang et al.	2020	Toxicon	The toxic effects and potential mechanisms of deoxynivalenol on the structural integrity of fish gill: Oxidative damage, apoptosis and tight junctions disruption
Grass carp (Ctenopharyngodon idella)	DON	in-vivo	60	Pure	Feed	27, 318, 636, 922, 1243 and 1515	Juveniles	Decreased copper/zinc superoxide dismutase (CuZnSOD), manganese superoxide dismutase (MnSOD) and catalase (CAT) activities in gills	Oxidative stress	318	27	Huang et al.	2020	Toxicon	The toxic effects and potential mechanisms of deoxynivalenol on the structural integrity of fish gill: Oxidative damage, apoptosis and tight junctions disruption
Grass carp (Ctenopharyngodon idella)	DON	in-vivo	60	Pure	Feed	27, 318, 636, 922, 1243 and 1515	Juveniles	Decreased glutathione peroxidase (GPx), glutathione-S-transferase (GST), glutathione reductase (GR) and glutathione (GSH) activities in gills	Oxidative stress	636	318	Huang et al.	2020	Toxicon	The toxic effects and potential mechanisms of deoxynivalenol on the structural integrity of fish gill: Oxidative damage, apoptosis and tight junctions disruption
Grass carp (Ctenopharyngodon idella)	DON	in-vivo	60	Pure	Feed	27, 318, 636, 922, 1243 and 1515	Juveniles	Decreased mRNA levels of CuZnSOD, MnSOD and CAT in gills	Oxidative stress	318	27	Huang et al.	2020	Toxicon	The toxic effects and potential mechanisms of deoxynivalenol on the structural integrity of fish gill: Oxidative damage, apoptosis and tight junctions disruption
Grass carp (Ctenopharyngodon idella)	DON	in-vivo	60	Pure	Feed	27, 318, 636, 922, 1243 and 1515	Juveniles	Decreased mRNA levels of GPx1a, GPx1b, GPx4a and GPx4b in gills	Oxidative stress	318	27	Huang et al.	2020	Toxicon	The toxic effects and potential mechanisms of deoxynivalenol on the structural integrity of fish gill: Oxidative damage, apoptosis and tight junctions disruption
Grass carp (Ctenopharyngodon idella)	DON	in-vivo	60	Pure	Feed	27, 318, 636, 922, 1243 and 1515	Juveniles	Decreased mRNA levels of Glutathione S-Transferase Omega 1 and 2 (GSTO1, GSTO2), GR and Nrf2 in gills	Oxidative stress	318	27	Huang et al.	2020	Toxicon	The toxic effects and potential mechanisms of deoxynivalenol on the structural integrity of fish gill: Oxidative damage, apoptosis and tight junctions disruption
Grass carp (Ctenopharyngodon idella)	DON	in-vivo	60	Pure	Feed	27, 318, 636, 922, 1243 and 1515	Juveniles	Decreased nuclear and cytosolic Nrf2 protein expressions in gills	Oxidative stress	636	318	Huang et al.	2020	Toxicon	The toxic effects and potential mechanisms of deoxynivalenol on the structural integrity of fish gill: Oxidative damage, apoptosis and tight junctions disruption
Grass carp (Ctenopharyngodon idella)	DON	in-vivo	60	Pure	Feed	27, 318, 636, 922, 1243 and 1515	Juveniles	Increased mRNA levels of Keap 1a in gills	Oxidative stress	636	318	Huang et al.	2020	Toxicon	The toxic effects and potential mechanisms of deoxynivalenol on the structural integrity of fish gill: Oxidative damage, apoptosis and tight junctions disruption
Grass carp (Ctenopharyngodon idella)	DON	in-vivo	60	Pure	Feed	27, 318, 636, 922, 1243 and 1515	Juveniles	Increased mRNA levels of caspase-2, caspase-3 and caspase-7 in gills	Cell apoptosis	922	636	Huang et al.	2020	Toxicon	The toxic effects and potential mechanisms of deoxynivalenol on the structural integrity of fish gill: Oxidative damage, apoptosis and tight junctions disruption
Grass carp (Ctenopharyngodon idella)	DON	in-vivo	60	Pure	Feed	27, 318, 636, 922, 1243 and 1515	Juveniles	Increased mRNA levels of caspase-8, caspase-9 and apoptotic protease activating factor-1 (Apaf-1) in gills	Cell apoptosis	636	318	Huang et al.	2020	Toxicon	The toxic effects and potential mechanisms of deoxynivalenol on the structural integrity of fish gill: Oxidative damage, apoptosis and tight junctions disruption
Grass carp (Ctenopharyngodon idella)	DON	in-vivo	60	Pure	Feed	27, 318, 636, 922, 1243 and 1515	Juveniles	Increased mRNA levels of Bcl-2 associated X protein (Bax), fatty acid synthetase ligand (FasL) and c-Jun N-terminal protein kinase (JNK) in gills	Cell apoptosis	922	636	Huang et al.	2020	Toxicon	The toxic effects and potential mechanisms of deoxynivalenol on the structural integrity of fish gill: Oxidative damage, apoptosis and tight junctions disruption
Grass carp (Ctenopharyngodon idella)	DON	in-vivo	60	Pure	Feed	27, 318, 636, 922, 1243 and 1515	Juveniles	Decreased mRNA levels of B-cell lymphoma protein-2 (Bcl-2), inhibitor of apoptosis proteins (IAP) and myeloid cell leukemia-1 (Mcl-1) in gills	Cell apoptosis	318	636	Huang et al.	2020	Toxicon	The toxic effects and potential mechanisms of deoxynivalenol on the structural integrity of fish gill: Oxidative damage, apoptosis and tight junctions disruption
Grass carp (Ctenopharyngodon idella)	DON	in-vivo	60	Pure	Feed	27, 318, 636, 922, 1243 and 1515	Juveniles	Decreased mRNA levels of tight junction proteins in gills; ZO-1 and ZO-2b	Gill integrity	636	318	Huang et al.	2020	Toxicon	The toxic effects and potential mechanisms of deoxynivalenol on the structural integrity of fish gill: Oxidative damage, apoptosis and tight junctions disruption
Grass carp (Ctenopharyngodon idella)	DON	in-vivo	60	Pure	Feed	27, 318, 636, 922, 1243 and 1515	Juveniles	Decreased mRNA levels of tight junction proteins in gills; occludin, claudin-c and claudin-f	Gill integrity	318	636	Huang et al.	2020	Toxicon	The toxic effects and potential mechanisms of deoxynivalenol on the structural integrity of fish gill: Oxidative damage, apoptosis and tight junctions disruption
Grass carp (Ctenopharyngodon idella)	DON	in-vivo	60	Pure	Feed	27, 318, 636, 922, 1243 and 1515	Juveniles	Decreased mRNA levels of tight junction proteins in gills; claudin-7a, claudin-7b as well as claudin-11	Gill integrity	636	318	Huang et al.	2020	Toxicon	The toxic effects and potential mechanisms of deoxynivalenol on the structural integrity of fish gill: Oxidative damage, apoptosis and tight junctions disruption
Grass carp (Ctenopharyngodon idella)	DON	in-vivo	60	Pure	Feed	27, 318, 636, 922, 1243 and 1515	Juveniles	Increased mRNA levels of tight junction proteins in gills; claudin-12, claudin-15a and myosin light chain kinase (MLCK)	Gill integrity	636	318	Huang et al.	2020	Toxicon	The toxic effects and potential mechanisms of deoxynivalenol on the structural integrity of fish gill: Oxidative damage, apoptosis and tight junctions disruption
Common carp (Cyprinus carpio L.)	*DON	in-vivo	28	Artificially contaminated corn	Feed	0, 5960	1-year-old	Increased mortality (16.7%, twice higher than the control)	Mortality	5960	0	Pelyhe et al.	2016	Mycotoxin Res	Effect of 4-week feeding of deoxynivalenol- or T-2-toxin-contaminated diet on lipid peroxidation and glutathione redox system in the hepatopancreas of common carp (Cyprinus carpio L.)
Common carp (Cyprinus carpio L.)	*DON	in-vivo	28	Artificially contaminated corn	Feed	0, 5960	1-year-old	Increase in reduced glutathione (GSH) concentration	Oxidative stress	5960	0	Pelyhe et al.	2016	Mycotoxin Res	Effect of 4-week feeding of deoxynivalenol- or T-2-toxin-contaminated diet on lipid peroxidation and glutathione redox system in the hepatopancreas of common carp (Cyprinus carpio L.)
Common carp (Cyprinus carpio L.)	*DON	in-vivo	28	Artificially contaminated corn	Feed	0, 5960	1-year-old	Increased mRNA levels of phospholipid hydroperoxide glutathione peroxidase genes: gpx4a and gpx4b	Oxidative stress	5960	0	Pelyhe et al.	2016	Mycotoxin Res	Effect of 4-week feeding of deoxynivalenol- or T-2-toxin-contaminated diet on lipid peroxidation and glutathione redox system in the hepatopancreas of common carp (Cyprinus carpio L.)
Common carp (Cyprinus carpio L.)	*DON	in-vivo	0.7	Artificially contaminated corn	Feed: single oral dose given by gavage	0, 200000	1-year-old	Increase in reduced glutathione (GSH) concentration and glutathione peroxidase (GPx) activity in liver	Oxidative stress	200000	0	Kövesi et al.	2020	Fish Physiology and Biochemistry	Short-term effects of deoxynivalenol, T-2 toxin, fumonisin B1 or ochratoxin on lipid peroxidation and glutathione redox system and its regulatory genes in common carp (Cyprinus carpio L.) liver
Common carp (Cyprinus carpio L.)	*DON	in-vivo	0.3	Artificially contaminated corn	Feed: single oral dose given by gavage	0, 200000	1-year-old	Down-regulation of gpx4a gene in liver	Oxidative stress	200000	0	Kövesi et al.	2020	Fish Physiology and Biochemistry	Short-term effects of deoxynivalenol, T-2 toxin, fumonisin B1 or ochratoxin on lipid peroxidation and glutathione redox system and its regulatory genes in common carp (Cyprinus carpio L.) liver
Common carp (Cyprinus carpio L.)	*DON	in-vivo	1	Artificially contaminated corn	Feed: single oral dose given by gavage	0, 200000	1-year-old	Up-regulation of gpx4a gene in liver	Oxidative stress	200000	0	Kövesi et al.	2020	Fish Physiology and Biochemistry	Short-term effects of deoxynivalenol, T-2 toxin, fumonisin B1 or ochratoxin on lipid peroxidation and glutathione redox system and its regulatory genes in common carp (Cyprinus carpio L.) liver
Common carp (Cyprinus carpio L.)	*DON	in-vivo	0.3	Artificially contaminated corn	Feed: single oral dose given by gavage	0, 200000	1-year-old	Down-regulation of gpx4b gene in liver	Oxidative stress	200000	0	Kövesi et al.	2020	Fish Physiology and Biochemistry	Short-term effects of deoxynivalenol, T-2 toxin, fumonisin B1 or ochratoxin on lipid peroxidation and glutathione redox system and its regulatory genes in common carp (Cyprinus carpio L.) liver
Common carp (Cyprinus carpio L.)	*DON	in-vivo	0.7	Artificially contaminated corn	Feed: single oral dose given by gavage	0, 200000	1-year-old	Down-regulation of keap1 gene in liver	Oxidative stress	200000	0	Kövesi et al.	2020	Fish Physiology and Biochemistry	Short-term effects of deoxynivalenol, T-2 toxin, fumonisin B1 or ochratoxin on lipid peroxidation and glutathione redox system and its regulatory genes in common carp (Cyprinus carpio L.) liver
Common carp (Cyprinus carpio L.)	*DON	in-vivo	0.3	Artificially contaminated corn	Feed: single oral dose given by gavage	0, 200000	1-year-old	Up-regulation of nrf2 gene in liver	Oxidative stress	200000	0	Kövesi et al.	2020	Fish Physiology and Biochemistry	Short-term effects of deoxynivalenol, T-2 toxin, fumonisin B1 or ochratoxin on lipid peroxidation and glutathione redox system and its regulatory genes in common carp (Cyprinus carpio L.) liver
Common carp (Cyprinus carpio L.)	*DON	in-vivo	0.7	Artificially contaminated corn	Feed: single oral dose given by gavage	0, 200000	1-year-old	Down-regulation of nrf2 gene in liver	Oxidative stress	200000	0	Kövesi et al.	2020	Fish Physiology and Biochemistry	Short-term effects of deoxynivalenol, T-2 toxin, fumonisin B1 or ochratoxin on lipid peroxidation and glutathione redox system and its regulatory genes in common carp (Cyprinus carpio L.) liver
Zebrafish (Danio rerio)	DON	in-vivo	45	Pure	Feed	0, 100, 500, 1500, 2000, 3000	30 days post hatch	Increased expression of cytochrome P-450 1A (CYP1A)	Biotransformation	2000	1500	Sanden et al.	2012	Food and Chemical Toxicology	Zebrafish (Danio rerio) as a model for investigating dietary toxic effects of deoxynivalenol contamination in aquaculture feeds
Zebrafish (Danio rerio)	DON	in-vivo	45	Pure	Feed	0, 100, 500, 1500, 2000, 3000	30 days post hatch	Trend towards increased expression of copper zinc superoxide dismutase (CuZn SOD) in liver	Oxidative stress	2000	1500	Sanden et al.	2012	Food and Chemical Toxicology	Zebrafish (Danio rerio) as a model for investigating dietary toxic effects of deoxynivalenol contamination in aquaculture feeds
Zebrafish (Danio rerio)	DON	in-vivo	45	Pure	Feed	0, 100, 500, 1500, 2000, 3000	30 days post hatch	Trend towards increased expression of cyclin G1 in liver	Oxidative stress	2000	1500	Sanden et al.	2012	Food and Chemical Toxicology	Zebrafish (Danio rerio) as a model for investigating dietary toxic effects of deoxynivalenol contamination in aquaculture feeds
Zebrafish (Danio rerio)	DON	in-vivo	45	Pure	Feed	0, 100, 500, 1500, 2000, 3000	30 days post hatch	Increased fecundity (measured as mean number of eggs produced by individual females)	Reproduction	1500	500	Sanden et al.	2012	Food and Chemical Toxicology	Zebrafish (Danio rerio) as a model for investigating dietary toxic effects of deoxynivalenol contamination in aquaculture feeds
Zebrafish (Danio rerio)	DON	in-vivo	45	Pure	Feed	0, 100, 500, 1500, 2000, 3000	30 days post hatch	Increased swimming activity and bell-shaped response pattern	Behavior	3000	1500	Sanden et al.	2012	Food and Chemical Toxicology	Zebrafish (Danio rerio) as a model for investigating dietary toxic effects of deoxynivalenol contamination in aquaculture feeds
Nile tilapia (Oreochromis niloticus)	*DON	in-vivo	70	Natural	Feed -low starch (12%)	100, 700, 1300	Fingerlings	Increased recovered energy (RE)	Energy balances	700	100	Hooft et al.	2019b	Aquaculture	A comparative investigation of the effects of feed-borne deoxynivalenol (DON) on growth performance, nutrient utilization and metabolism of detoxification in rainbow trout (Oncorhynchus mykiss) and Nile tilapia (Oreochromis niloticus) fed diets containing different levels of digestible carbohydrates
Nile tilapia (Oreochromis niloticus)	*DON	in-vivo	70	Natural	Feed -high starch (24%)	100, 700, 1300	Fingerlings	Increased nitrogen retention eﬃciency (NRE)	Nitrogen balances	700	100	Hooft et al.	2019b	Aquaculture	A comparative investigation of the effects of feed-borne deoxynivalenol (DON) on growth performance, nutrient utilization and metabolism of detoxification in rainbow trout (Oncorhynchus mykiss) and Nile tilapia (Oreochromis niloticus) fed diets containing different levels of digestible carbohydrates
Nile tilapia (Oreochromis niloticus)	*DON	in-vivo	70	Natural	Feed -high starch (24%)	100, 700, 1300	Fingerlings	Increased ash body content	Carcass composition	1300	700	Hooft et al.	2019b	Aquaculture	A comparative investigation of the effects of feed-borne deoxynivalenol (DON) on growth performance, nutrient utilization and metabolism of detoxification in rainbow trout (Oncorhynchus mykiss) and Nile tilapia (Oreochromis niloticus) fed diets containing different levels of digestible carbohydrates
Nile tilapia (Oreochromis niloticus)	*DON	in-vivo	70	Natural	Feed -high starch (24%)	100, 700, 1300	Fingerlings	Increased uridine diphosphate glucuronosyltransferase (UDPGT) activity and expression of UGT1A gene	Detoxification	700	100	Hooft et al.	2019b	Aquaculture	A comparative investigation of the effects of feed-borne deoxynivalenol (DON) on growth performance, nutrient utilization and metabolism of detoxification in rainbow trout (Oncorhynchus mykiss) and Nile tilapia (Oreochromis niloticus) fed diets containing different levels of digestible carbohydrates
Red Tilapia (Oreochromis niloticus × O. mossambicus)	DON*	in-vivo	56	Natural	Feed	70, 310 , 500, 920, 1150	Fingerlings	Reduced feed intake, weight gain, feed efficiency	Growth performance	500	310	Tola et al.	2015	Toxins	Effects of Wheat Naturally Contaminated with Fusarium Mycotoxins on Growth Performance and Selected Health Indices of Red Tilapia (Oreochromis niloticus × O. mossambicus)
Red Tilapia (Oreochromis niloticus × O. mossambicus)	DON*	in-vivo	56	Natural	Feed	70, 310 , 500, 920, 1150	Fingerlings	Increased mortality	Mortality	500	310	Tola et al.	2015	Toxins	Effects of Wheat Naturally Contaminated with Fusarium Mycotoxins on Growth Performance and Selected Health Indices of Red Tilapia (Oreochromis niloticus × O. mossambicus)
Channel catfish (Ictalurus punctatus)	DON	in-vivo	49	Natural	Feed	0, 3300, 5500, 7700, 8800	Fingerlings	Reduced mortality in DON-treated fish after bacterial challenge	Mortality	5500	3300	Manning et al.	2014	Aquaculture Research	The effect of feeding diets containing deoxynivalenol contaminated corn on channel catfish (Ictalurus punctatus) challenged with Edwardsiella ictaluri
Channel catfish (Ictalurus punctatus)	DON	in-vivo	49	Natural	Feed	0, 3300, 5500, 7700, 8800	Fingerlings	Reduced feed conversion ratio	Growth performance	8800	3300	Manning et al.	2014	Aquaculture Research	The effect of feeding diets containing deoxynivalenol contaminated corn on channel catfish (Ictalurus punctatus) challenged with Edwardsiella ictaluri
