# Supplementary material for: The Occurrence of Mycotoxins in Raw Materials and Fish Feeds in Europe and the Potential Effects of Deoxynivalenol (DON) on the Health and Growth of Farmed Fish Species—A Review
Source: Toxins (Basel). 2021 Jun 5;13(6):403. doi: 10.3390/toxins13060403 (PMC8226812; doi:10.3390/toxins13060403)
Supplement: Supplementary file 1 [file toxins-13-00403-s001.zip › Table S5. Data points for LOEL and NOAEL used in the risk assessment.xlsx]

## Sheet: LOAEL,NOAEL
Table S5. Data points for LOEL and NOAEL used in the risk assessment.
Species	Lowest Observed Adverse Effect Level (LOAEL)	No Observed Adverse Effect Level (NOAEL)	Author	Year
Atlantic salmon (Salmo salar)	6000	2000	Bernhoft et al.	2017
Atlantic salmon (Salmo salar)	4000	2000	Bernhoft et al.	2018
Atlantic salmon (Salmo salar)	6000	4000	Bernhoft et al.	2018
Atlantic salmon (Salmo salar)	4000	2000	Bernhoft et al.	2018
Atlantic salmon (Salmo salar)	1000	500	Bernhoft et al.	2018
Atlantic salmon (Salmo salar)	2000	1000	Bernhoft et al.	2018
Atlantic salmon (Salmo salar)	6000	4000	Bernhoft et al.	2018
Atlantic salmon (Salmo salar)	5500		Moldal et al.	2018
Atlantic salmon (Salmo salar)	5500		Moldal et al.	2018
Atlantic salmon (Salmo salar)	5500		Moldal et al.	2018
Atlantic salmon (Salmo salar)	5500		Moldal et al.	2018
Rainbow trout (Oncorhynchus mykiss)	800	300	Hooft et al.	2011
Rainbow trout (Oncorhynchus mykiss)	2600	2000	Hooft et al.	2011
Rainbow trout (Oncorhynchus mykiss)	1400	800	Hooft et al.	2011
Rainbow trout (Oncorhynchus mykiss)	2600	2000	Hooft et al.	2011
Rainbow trout (Oncorhynchus mykiss)	1400	800	Hooft et al.	2011
Rainbow trout (Oncorhynchus mykiss)	2600	1400	Hooft et al.	2011
Rainbow trout (Oncorhynchus mykiss)	1000	300	Hooft et al.	2017
Rainbow trout (Oncorhynchus mykiss)	1000	300	Hooft et al.	2017
Rainbow trout (Oncorhynchus mykiss)	1500	1000	Hooft et al.	2017
Rainbow trout (Oncorhynchus mykiss)	2000	1500	Hooft et al.	2017
Rainbow trout (Oncorhynchus mykiss)	2000	1500	Hooft et al.	2017
Rainbow trout (Oncorhynchus mykiss)	1400	700	Hooft et al.	2019a
Rainbow trout (Oncorhynchus mykiss)	1400	700	Hooft et al.	2019a
Rainbow trout (Oncorhynchus mykiss)	2100	1400	Hooft et al.	2019a
Rainbow trout (Oncorhynchus mykiss)	2100	1400	Hooft et al.	2019a
Rainbow trout (Oncorhynchus mykiss)	2100		Hooft et al.	2019a
Rainbow trout (Oncorhynchus mykiss)	2100		Hooft et al.	2019a
Rainbow trout (Oncorhynchus mykiss)	2100		Hooft et al.	2019a
Rainbow trout (Oncorhynchus mykiss)	4100	2100	Hooft et al.	2019a
Rainbow trout (Oncorhynchus mykiss)	5900	4100	Hooft et al.	2019a
Rainbow trout (Oncorhynchus mykiss)	2100		Hooft et al.	2019a
Rainbow trout (Oncorhynchus mykiss)	1300	700	Hooft et al.	2019b
Rainbow trout (Oncorhynchus mykiss)	1300	700	Hooft et al.	2019b
Rainbow trout (Oncorhynchus mykiss)	1300	700	Hooft et al.	2019b
Rainbow trout (Oncorhynchus mykiss)	700	100	Hooft et al.	2019b
Rainbow trout (Oncorhynchus mykiss)	700	100	Hooft et al.	2019b
Rainbow trout (Oncorhynchus mykiss)	1300	700	Hooft et al.	2019b
Rainbow trout (Oncorhynchus mykiss)	1300	700	Hooft et al.	2019b
Rainbow trout (Oncorhynchus mykiss)	1300	700	Hooft et al.	2019b
Rainbow trout (Oncorhynchus mykiss)	1300	700	Hooft et al.	2019b
Rainbow trout (Oncorhynchus mykiss)	4714	37	Gonçalves et al.	2018
Rainbow trout (Oncorhynchus mykiss)	4714	37	Gonçalves et al.	2018
Rainbow trout (Oncorhynchus mykiss)	4714	37	Gonçalves et al.	2018
Rainbow trout (Oncorhynchus mykiss)	11412	4714	Gonçalves et al.	2018
Rainbow trout (Oncorhynchus mykiss)	4714	37	Gonçalves et al.	2018
Rainbow trout (Oncorhynchus mykiss)	4714	37	Gonçalves et al.	2018
Rainbow trout (Oncorhynchus mykiss)	4714	37	Gonçalves et al.	2018
Rainbow trout (Oncorhynchus mykiss)	2745	1166	Gonçalves et al.	2019
Rainbow trout (Oncorhynchus mykiss)	1166		Gonçalves et al.	2019
Rainbow trout (Oncorhynchus mykiss)	2745	1166	Gonçalves et al.	2019
Rainbow trout (Oncorhynchus mykiss)	1166		Gonçalves et al.	2019
Rainbow trout (Oncorhynchus mykiss)	2745	1166
Rainbow trout (Oncorhynchus mykiss)	4100	500	Ryerse et al.	2016
Rainbow trout (Oncorhynchus mykiss)	4100	500	Ryerse et al.	2016
Rainbow trout (Oncorhynchus mykiss)	1964	225	Matejova et al.	2014
Rainbow trout (Oncorhynchus mykiss)	1964	225	Matejova et al.	2014
Rainbow trout (Oncorhynchus mykiss)	1964	225	Matejova et al.	2014
Rainbow trout (Oncorhynchus mykiss)	1964	225	Matejova et al.	2015
Rainbow trout (Oncorhynchus mykiss)	1964	225	Šišperová	2015
Rainbow trout (Oncorhynchus mykiss)	1964	225	Šišperová	2015
Rainbow trout (Oncorhynchus mykiss)	3100	100	Ryerse et al.	2015
Rainbow trout (Oncorhynchus mykiss)	6400	3100	Ryerse et al.	2015
Rainbow trout (Oncorhynchus mykiss)	3100	100	Ryerse et al.	2015
Rainbow trout (Oncorhynchus mykiss)	3300	100	Ryerse et al.	2015
Rainbow trout (Oncorhynchus mykiss)	3300	100	Ryerse et al.	2015
Rainbow trout (Oncorhynchus mykiss)	1000		Woodward et al.	1983
Carp (Cyprinus carpio L.)	619	352	Pietsch et al.	2014a
Carp (Cyprinus carpio L.)	953	619	Pietsch et al.	2014a
Carp (Cyprinus carpio L.)	352		Pietsch et al.	2014a
Carp (Cyprinus carpio L.)	953	619	Pietsch et al.	2014a
Carp (Cyprinus carpio L.)	953	619	Pietsch et al.	2014a
Carp (Cyprinus carpio L.)	352		Pietsch et al.	2014a
Carp (Cyprinus carpio L.)	619	352	Pietsch et al.	2014a
Carp (Cyprinus carpio L.)	619	352	Pietsch et al.	2014a
Carp (Cyprinus carpio L.)	953	619	Pietsch et al.	2014a
Carp (Cyprinus carpio L.)	619	352	Pietsch et al.	2014a
Carp (Cyprinus carpio L.)	352		Pietsch et al.	2014b
Carp (Cyprinus carpio L.)	352		Pietsch et al.	2014b
Carp (Cyprinus carpio L.)	352		Pietsch et al.	2014b
Carp (Cyprinus carpio L.)	619	352	Pietsch et al.	2014b
Carp (Cyprinus carpio L.)	352		Pietsch et al.	2014b
Carp (Cyprinus carpio L.)	953	619	Pietsch et al.	2014b
Carp (Cyprinus carpio L.)	619	352	Pietsch et al.	2014b
Carp (Cyprinus carpio L.)	953		Pietsch et al.	2015a
Carp (Cyprinus carpio L.)	953		Pietsch et al.	2015a
Carp (Cyprinus carpio L.)	953		Pietsch et al.	2015a
Carp (Cyprinus carpio L.)	953		Pietsch et al.	2015a
Carp (Cyprinus carpio L.)	953		Pietsch et al.	2015a
Carp (Cyprinus carpio L.)	953		Pietsch et al.	2015a
Carp (Cyprinus carpio L.)	953		Pietsch et al.	2015a
Carp (Cyprinus carpio L.)	953		Pietsch et al.	2015a
Carp (Cyprinus carpio L.)	953		Pietsch et al.	2015a
Carp (Cyprinus carpio L.)	953		Pietsch et al.	2015b
Carp (Cyprinus carpio L.)	953		Pietsch et al.	2015b
Carp (Cyprinus carpio L.)	953		Pietsch et al.	2015b
Carp (Cyprinus carpio L.)	953		Pietsch et al.	2015b
Carp (Cyprinus carpio L.)	953		Pietsch et al.	2015b
Carp (Cyprinus carpio L.)	953		Pietsch et al.	2015b
Grass carp (Ctenopharyngodon idella)	636	318	Huang et al.	2018
Grass carp (Ctenopharyngodon idella)	636	318	Huang et al.	2018
Grass carp (Ctenopharyngodon idella)	636	318	Huang et al.	2018
Grass carp (Ctenopharyngodon idella)	1243	922	Huang et al.	2018
Grass carp (Ctenopharyngodon idella)	318	27	Huang et al.	2018
Grass carp (Ctenopharyngodon idella)	318	27	Huang et al.	2018
Grass carp (Ctenopharyngodon idella)	636	318	Huang et al.	2018
Grass carp (Ctenopharyngodon idella)	318	27	Huang et al.	2018
Grass carp (Ctenopharyngodon idella)	636	318	Huang et al.	2019
Grass carp (Ctenopharyngodon idella)	318	27	Huang et al.	2019
Grass carp (Ctenopharyngodon idella)	636	318	Huang et al.	2019
Grass carp (Ctenopharyngodon idella)	318	27	Huang et al.	2019
Grass carp (Ctenopharyngodon idella)	636	318	Huang et al.	2020
Grass carp (Ctenopharyngodon idella)	1515	1243	Huang et al.	2020
Grass carp (Ctenopharyngodon idella)	636	318	Huang et al.	2020
Grass carp (Ctenopharyngodon idella)	318	27	Huang et al.	2020
Grass carp (Ctenopharyngodon idella)	318	27	Huang et al.	2020
Grass carp (Ctenopharyngodon idella)	636	318	Huang et al.	2020
Grass carp (Ctenopharyngodon idella)	318	27	Huang et al.	2020
Grass carp (Ctenopharyngodon idella)	318	27	Huang et al.	2020
Grass carp (Ctenopharyngodon idella)	318	27	Huang et al.	2020
Grass carp (Ctenopharyngodon idella)	636	318	Huang et al.	2020
Grass carp (Ctenopharyngodon idella)	636	318	Huang et al.	2020
Grass carp (Ctenopharyngodon idella)	922	636	Huang et al.	2020
Grass carp (Ctenopharyngodon idella)	636	318	Huang et al.	2020
Grass carp (Ctenopharyngodon idella)	922	636	Huang et al.	2020
Grass carp (Ctenopharyngodon idella)	318	636	Huang et al.	2020
Grass carp (Ctenopharyngodon idella)	636	318	Huang et al.	2020
Grass carp (Ctenopharyngodon idella)	318	636	Huang et al.	2020
Grass carp (Ctenopharyngodon idella)	636	318	Huang et al.	2020
Grass carp (Ctenopharyngodon idella)	636	318	Huang et al.	2020
Common carp (Cyprinus carpio L.)	5960		Pelyhe et al.	2016
Common carp (Cyprinus carpio L.)	5960		Pelyhe et al.	2016
Common carp (Cyprinus carpio L.)	5960		Pelyhe et al.	2016
Zebrafish (Danio rerio)	2000	1500	Sanden et al.	2012
Zebrafish (Danio rerio)	2000	1500	Sanden et al.	2012
Zebrafish (Danio rerio)	2000	1500	Sanden et al.	2012
Zebrafish (Danio rerio)	1500	500	Sanden et al.	2012
Zebrafish (Danio rerio)	3000	1500	Sanden et al.	2012
Nile tilapia (Oreochromis niloticus)	700	100	Hooft et al.	2019b
Nile tilapia (Oreochromis niloticus)	700	100	Hooft et al.	2019b
Nile tilapia (Oreochromis niloticus)	1300	700	Hooft et al.	2019b
Nile tilapia (Oreochromis niloticus)	700	100	Hooft et al.	2019b
Red Tilapia (Oreochromis niloticus × O. mossambicus)	500	310	Tola et al.	2015
Red Tilapia (Oreochromis niloticus × O. mossambicus)	500	310	Tola et al.	2015
Channel catfish (Ictalurus punctatus)	5500	3300	Manning et al.	2014
Channel catfish (Ictalurus punctatus)	8800	3300	Manning et al.	2014
