# Supplementary material for: The Occurrence of Mycotoxins in Raw Materials and Fish Feeds in Europe and the Potential Effects of Deoxynivalenol (DON) on the Health and Growth of Farmed Fish Species—A Review
Source: Toxins (Basel). 2021 Jun 5;13(6):403. doi: 10.3390/toxins13060403 (PMC8226812; doi:10.3390/toxins13060403)
Supplement: Supplementary file 1 [file toxins-13-00403-s001.zip › Table S6. Predicted CC5 datapoints.xlsx]

## Sheet: CC5 summary
Table S6. Predicted CC5 datapoints.
	CC5 without trout	CC5 only trout	CC5 salmonids	CC5 all fish
1	1.80154	1.69786	1.98638	1.62435
2	1.77474	1.77724	1.86626	1.41536
3	1.67834	1.72478	1.78648	1.4431
4	1.64629	1.87688	2.02713	1.6543
5	1.68931	1.57314	1.88055	1.55528
6	1.73988	1.7248	1.86559	1.5047
7	1.6944	1.72144	1.92869	1.38498
8	1.76145	1.71227	1.85583	1.51248
9	1.73222	1.55143	1.85509	1.44965
10	1.76114	1.70603	1.86862	1.38086
11	1.71671	1.66457	1.8662	1.38627
12	1.70851	1.67451	1.82198	1.62658
13	1.78356	1.65794	1.87227	1.39052
14	1.81268	1.50534	1.80007	1.5955
15	1.85478	1.62182	1.8104	1.58048
16	1.81426	1.5684	1.89266	1.61406
17	1.63488	1.51087	1.96481	1.5685
18	1.55729	1.50677	2.02975	1.60749
19	1.81271	1.54179	2.0382	1.63082
20	1.86897	1.78084	2.14143	1.58547
21	1.73383	1.34004	1.90887	1.52784
22	1.80704	1.3871	1.98009	1.4497
23	1.63757	1.44705	1.97507	1.47384
24	1.81425	1.61079	1.98724	1.55872
25	1.79642	1.69146	1.88376	1.5393
26	1.88145	1.60008	1.83949	1.50307
27	1.64816	1.62114	2.02063	1.48729
28	1.67808	1.79608	1.80118	1.45462
29	1.89928	1.67077	1.79823	1.53138
30	1.72283	1.80128	1.86044	1.44376
31	1.70073	1.68775	1.84589	1.50095
32	1.76962	1.58443	1.80228	1.45102
33	1.76202	1.73834	1.78221	1.42586
34	1.66844	1.68745	1.84528	1.48492
35	1.59271	1.56193	1.98617	1.59872
36	1.70173	1.68488	1.87229	1.39097
37	1.83125	1.88973	1.86872	1.42397
38	1.68543	1.76292	1.67547	1.22078
39	1.73164	1.70115	1.81938	1.56316
40	1.78063	1.62784	1.94149	1.4804
41	1.78506	1.53443	1.81661	1.48109
42	1.57721	1.48412	1.75807	1.57862
43	1.72841	1.6063	2.12059	1.42303
44	1.7699	1.76033	1.90049	1.53
45	1.76175	1.56849	1.99206	1.46385
46	1.77851	1.52158	2.00203	1.43272
47	1.86179	1.68358	1.82127	1.48751
48	1.61094	1.59858	1.89468	1.52277
49	1.8182	1.64244	1.74051	1.61438
50	1.78955	1.86409	1.65992	1.56176
51	1.65133	1.62239	1.85848	1.41306
52	1.67156	1.45899	1.78979	1.5302
53	1.70751	1.70442	1.72701	1.45132
54	1.74884	1.78719	1.65862	1.35115
55	1.82504	1.39022	1.89132	1.50401
56	1.78038	1.70715	1.97967	1.3898
57	1.88829	1.63993	1.91777	1.39775
58	1.6195	1.75486	1.68518	1.48289
59	1.80741	1.2859	1.91273	1.57377
60	1.75958	1.63549	1.81669	1.45401
61	1.68042	1.60575	1.84293	1.37545
62	1.6752	1.74372	1.92121	1.47745
63	1.74377	1.70509	2.07652	1.46369
64	1.82835	1.86649	1.86802	1.48563
65	1.63369	1.64385	1.78167	1.59197
66	1.89937	1.74914	1.86124	1.48114
67	1.7532	1.70286	1.81039	1.35159
68	1.74727	1.62603	1.87587	1.42095
69	1.84536	1.68679	1.7662	1.51276
70	1.72195	1.74202	1.78862	1.5114
71	1.64426	1.70622	1.69457	1.34481
72	1.69531	1.63235	1.62107	1.39093
73	1.74804	1.54693	1.93378	1.51611
74	1.65342	1.68453	1.81689	1.60421
75	1.83429	1.64567	1.77053	1.41337
76	1.42826	1.7454	1.89285	1.56314
77	1.656	1.59155	1.86535	1.55001
78	1.70242	1.56144	1.65947	1.5208
79	1.68944	1.62483	1.83997	1.49319
80	1.60855	1.50011	2.03856	1.46219
81	1.76222	1.48283	1.93154	1.54669
82	1.7252	1.5132	1.84648	1.42627
83	1.82575	1.77928	1.71035	1.49939
84	1.65303	1.66781	1.92437	1.55932
85	1.60977	1.70318	1.8721	1.67108
86	1.66988	1.66576	1.97925	1.46552
87	1.58504	1.57402	1.76425	1.49957
88	1.59236	1.62306	1.76999	1.43282
89	1.75374	1.74961	1.89372	1.38787
90	1.83594	1.75454	2.01014	1.56145
91	1.71733	1.67845	1.83228	1.50736
92	1.72509	1.7595	1.86012	1.49497
93	1.77119	1.62555	1.89364	1.40606
94	1.61084	1.69417	1.87286	1.51729
95	1.71792	1.75457	1.97939	1.50414
96	1.86064	1.71963	1.69068	1.45562
97	1.80272	1.61463	1.82619	1.51803
98	1.73761	1.7367	2.02226	1.53039
99	1.86774	1.46919	2.05544	1.47998
100	1.76698	1.56851	1.91549	1.4579
101	1.63337	1.50753	1.8499	1.35489
102	1.66232	1.63483	1.73094	1.46194
103	1.76378	1.69923	1.89265	1.53579
104	1.76729	1.81144	1.90895	1.46362
105	1.7713	1.71185	1.88703	1.58317
106	1.63846	1.64624	2.00747	1.52931
107	1.92081	1.70893	1.85118	1.63853
108	1.85861	1.5183	1.79941	1.544
109	1.5915	1.81873	1.74877	1.39845
110	1.77542	1.71955	2.01926	1.4857
111	1.72063	1.75036	2.02	1.49479
112	1.80642	1.63515	1.69024	1.56816
113	1.71591	1.54995	1.8033	1.40873
114	1.68075	1.68773	1.71108	1.40762
115	1.82922	1.80193	1.899	1.46153
116	1.68656	1.58943	1.93673	1.46788
117	1.71469	1.76915	1.86286	1.3873
118	1.57481	1.73857	1.9325	1.40655
119	1.50333	1.57839	2.01744	1.43952
120	1.6919	1.40185	2.02438	1.4773
121	1.83325	1.86895	1.64902	1.53426
122	1.83877	1.70861	1.92031	1.49398
123	1.59807	1.49116	2.05045	1.58492
124	1.69143	1.59544	1.90008	1.59563
125	1.63553	1.58806	1.85541	1.42446
126	1.58985	1.54351	2.00367	1.48206
127	1.70805	1.73216	1.8485	1.61176
128	1.76041	1.69422	1.77834	1.52035
129	1.47528	1.80683	1.48919	1.50114
130	1.79392	1.6775	2.0404	1.52435
131	1.84694	1.71194	1.9211	1.51588
132	1.75203	1.72619	1.92882	1.51612
133	1.74222	1.72989	2.09003	1.34151
134	1.85523	1.45443	1.93466	1.45837
135	1.6073	1.71156	1.79529	1.48604
136	1.76124	1.64479	1.85521	1.59588
137	1.58308	1.53004	1.82171	1.42795
138	1.59722	1.59305	1.9722	1.45633
139	1.69416	1.67097	1.93954	1.57893
140	1.71122	1.61973	1.82371	1.57964
141	1.84581	1.5151	1.93687	1.39673
142	1.64037	1.79801	1.86983	1.41943
143	1.84408	1.55675	1.81863	1.45034
144	1.75531	1.28816	1.87388	1.5999
145	1.80086	1.72515	1.77036	1.68748
146	1.75081	1.77449	1.89459	1.59511
147	1.63923	1.7681	1.8951	1.55297
148	1.58589	1.58989	1.90345	1.54553
149	1.78063	1.54715	1.78613	1.47127
150	1.61646	1.8182	1.77244	1.51781
151	1.58511	1.36823	1.75468	1.4233
152	1.78455	1.70304	1.95268	1.60164
153	1.76851	1.50597	1.99872	1.56748
154	1.82096	1.8344	1.90406	1.32254
155	1.78437	1.73352	1.84872	1.38185
156	1.66702	1.51099	1.65843	1.55271
157	1.76373	1.78823	1.95589	1.47054
158	1.76492	1.71806	1.78903	1.54249
159	1.80923	1.72002	1.89509	1.35555
160	1.64108	1.47459	1.85252	1.6327
161	1.75313	1.68369	1.91337	1.51816
162	1.68363	1.55592	2.13952	1.53765
163	1.6764	1.86738	1.87016	1.51141
164	1.63245	1.71819	1.91215	1.55681
165	1.84316	1.77183	1.78261	1.54679
166	1.78078	1.85036	1.84049	1.49113
167	1.6513	1.62022	1.42382	1.49024
168	1.81888	1.78155	1.86034	1.52577
169	1.4767	1.68485	1.87468	1.50633
170	1.75903	1.83131	1.7604	1.56578
171	1.82084	1.61163	1.9864	1.39132
172	1.5166	1.51854	1.8551	1.46352
173	1.72669	1.64588	1.87374	1.52178
174	1.77843	1.56828	1.7269	1.64632
175	1.75336	1.70104	1.71474	1.54762
176	1.63329	1.4483	1.99542	1.56949
177	1.70818	1.73513	1.80787	1.37591
178	1.75706	1.77299	1.89778	1.3283
179	1.62237	1.75478	1.82174	1.45934
180	1.64442	1.91595	1.98971	1.43151
181	1.63233	1.68902	1.85093	1.53295
182	1.74516	1.61422	1.87066	1.5459
183	1.72708	1.67226	1.83941	1.54809
184	1.83738	1.66511	1.81105	1.63517
185	1.79146	1.60859	1.9294	1.48682
186	1.83909	1.74072	1.79209	1.32559
187	1.80775	1.55832	1.77116	1.44187
188	1.70939	1.74001	1.80903	1.65623
189	1.80168	1.94887	1.84525	1.43846
190	1.6674	1.71044	1.94416	1.4604
191	1.76027	1.64907	1.7709	1.62335
192	1.79505	1.63149	1.66882	1.48113
193	1.62823	1.61758	1.78025	1.58568
194	1.6974	1.66226	2.04583	1.48999
195	1.66763	1.39891	1.77984	1.50191
196	1.80504	1.76464	2.14702	1.55403
197	1.75922	1.56823	1.73984	1.53468
198	1.68959	1.65912	1.80882	1.52912
199	1.64825	1.58576	1.9267	1.50399
200	1.68253	1.64881	1.79437	1.49476
201	1.73855	1.5538	2.00252	1.49745
202	1.68212	1.69279	1.83618	1.62796
203	1.77029	1.51658	1.86052	1.51744
204	1.79949	1.48795	1.98774	1.60652
205	1.65277	1.56557	1.84769	1.41792
206	1.73942	1.51342	1.77284	1.44539
207	1.69283	1.65266	1.85967	1.519
208	1.85417	1.55309	1.85839	1.51857
209	1.71721	1.55988	1.98139	1.55783
210	1.64649	1.71556	1.89637	1.50327
211	1.6941	1.53171	1.89069	1.50245
212	1.62823	1.62432	1.78216	1.42891
213	1.90965	1.64555	1.94867	1.42141
214	1.76254	1.75222	1.78763	1.50883
215	1.76678	1.58146	1.78045	1.45339
216	1.8515	1.52137	1.58469	1.67512
217	1.6507	1.7799	1.95081	1.47614
218	1.79654	1.55063	1.94603	1.56083
219	1.68642	1.66934	1.89507	1.53969
220	1.77302	1.66636	1.92934	1.42213
221	1.67762	1.67879	1.94901	1.60775
222	1.80651	1.69844	1.65821	1.46335
223	1.72687	1.6067	1.61486	1.52136
224	1.69003	1.85478	1.85598	1.27537
225	1.74709	1.60681	1.94899	1.36917
226	1.69403	1.6133	1.81559	1.48522
227	1.79889	1.41642	1.85182	1.49705
228	1.71834	1.54784	1.86075	1.43083
229	1.582	1.40061	1.9328	1.56015
230	1.66211	1.84189	1.92527	1.57839
231	1.82601	1.61085	1.98128	1.58983
232	1.747	1.62984	1.7728	1.51232
233	1.76545	1.88916	1.86595	1.50915
234	1.73007	1.53836	1.65764	1.57273
235	1.76178	1.44503	1.79846	1.33956
236	1.72128	1.58615	1.8527	1.55338
237	1.90577	1.56668	1.95043	1.5233
238	1.73497	1.789	1.9409	1.55689
239	1.68841	1.79858	1.8019	1.56581
240	1.91655	1.47765	1.81331	1.40828
241	1.8415	1.41345	1.83015	1.49281
242	1.83526	1.76455	2.02217	1.53445
243	1.68236	1.66053	1.69108	1.49878
244	1.59614	1.64628	1.69221	1.49264
245	1.61979	1.51289	2.04126	1.53624
246	1.73119	1.73915	1.92815	1.64417
247	1.68815	1.72435	1.81075	1.47517
248	1.75133	1.88691	1.92126	1.44096
249	1.67097	1.49507	1.95686	1.39204
250	1.71255	1.48741	1.95651	1.44382
251	1.67952	1.53896	1.91738	1.32044
252	1.84286	1.8021	1.80683	1.45707
253	1.75759	1.63093	1.93795	1.59654
254	1.73835	1.5598	1.8724	1.49564
255	1.76488	1.57751	2.01237	1.4159
256	1.74861	1.78346	1.88749	1.52007
257	1.80722	1.74138	1.92442	1.53219
258	1.75087	1.74492	1.81301	1.61446
259	1.74654	1.75954	1.85808	1.57938
260	1.66761	1.69331	1.93662	1.5254
261	1.63879	1.70625	1.90625	1.62176
262	1.81764	1.63776	1.88975	1.5758
263	1.80049	1.81693	1.93507	1.35884
264	1.92468	1.72584	1.65083	1.43597
265	1.5528	1.83607	1.7139	1.4096
266	1.7323	1.42841	1.99894	1.50571
267	1.72961	1.70897	1.81011	1.54583
268	1.73643	1.61453	1.99091	1.55379
269	1.7238	1.77915	1.84175	1.43211
270	1.74327	1.66849	1.90716	1.54758
271	1.63707	1.64639	1.65842	1.50624
272	1.66938	1.79426	1.94333	1.45937
273	1.59949	1.57584	1.99158	1.4476
274	1.7071	1.82217	1.77623	1.58491
275	1.88746	1.85933	1.93872	1.44008
276	1.72975	1.44468	1.69396	1.44122
277	1.75502	1.79357	1.81593	1.55302
278	1.72886	1.42437	1.70419	1.58245
279	1.77604	1.40648	1.80043	1.61598
280	1.68223	1.57835	1.91339	1.49996
281	1.59521	1.8577	2.02181	1.33571
282	1.92092	1.64393	1.71003	1.54983
283	1.75467	1.78674	1.87403	1.48454
284	1.79933	1.60532	1.90378	1.40841
285	1.78644	1.83368	1.92267	1.58755
286	1.80047	1.77556	1.9482	1.42819
287	1.69201	1.5572	2.04195	1.54241
288	1.74735	1.70816	1.88346	1.4122
289	1.68729	1.63565	1.90023	1.56282
290	1.78298	1.58472	1.94566	1.46652
291	1.68645	1.67294	1.86993	1.53503
292	1.78364	1.54784	1.86997	1.49281
293	1.76181	1.84749	1.80687	1.51486
294	1.88919	1.92981	1.95795	1.56887
295	1.72328	1.65186	1.77024	1.52885
296	1.77003	1.7624	1.67788	1.49736
297	1.76841	1.45953	1.84552	1.47257
298	1.97711	1.30301	1.87447	1.48775
299	1.72984	1.74506	1.88338	1.62829
300	1.62728	1.81536	1.8294	1.62704
301	1.78472	1.50834	1.9285	1.61888
302	1.85206	1.45892	1.87792	1.56544
303	1.85192	1.69002	1.75045	1.37212
304	1.76619	1.51027	1.975	1.44589
305	1.73854	1.74631	1.97388	1.53563
306	1.78881	1.64262	1.95714	1.57328
307	1.60581	1.60361	1.84754	1.47131
308	1.59776	1.70895	1.74116	1.56014
309	1.66809	1.6069	1.89351	1.50615
310	1.86899	1.85291	1.91099	1.4713
311	1.70309	1.72931	1.87713	1.53989
312	1.78386	1.70096	1.98117	1.5941
313	1.70484	1.65306	1.77053	1.45078
314	1.86478	1.77908	1.91803	1.35927
315	1.71926	1.54916	1.95322	1.55069
316	1.84569	1.41559	1.90346	1.55495
317	1.65334	1.70948	1.88794	1.50748
318	1.56386	1.6745	1.96241	1.45239
319	1.59935	1.79094	1.91257	1.53138
320	1.57745	1.61103	1.81396	1.50416
321	1.55636	1.50738	1.80332	1.57615
322	1.74659	1.7365	1.98206	1.31232
323	1.82324	1.64638	1.81873	1.50851
324	1.58242	1.61427	1.90414	1.58548
325	1.71343	1.59507	2.07071	1.41162
326	1.54782	1.54397	1.6949	1.42882
327	1.74203	1.89783	1.89563	1.53308
328	1.69485	1.99274	1.95997	1.39557
329	1.45392	1.79029	1.98466	1.45958
330	1.73845	1.60075	1.91463	1.54964
331	1.77361	1.81797	2.13421	1.59335
332	1.76748	1.63463	1.89578	1.3278
333	1.71936	1.79832	1.92335	1.42087
334	1.78497	1.60349	1.72998	1.44317
335	1.68053	1.73717	1.72547	1.41657
336	1.7253	1.56228	1.72644	1.49133
337	1.85482	1.67677	1.89182	1.57297
338	1.66256	1.42686	2.02341	1.44033
339	1.70459	1.61916	1.77701	1.39737
340	1.62062	1.49493	1.98411	1.57047
341	1.78412	1.66622	1.80394	1.49737
342	1.71284	1.73745	1.86719	1.58163
343	1.56696	1.65809	1.70311	1.44439
344	1.77468	1.66182	1.98635	1.53035
345	1.86415	1.38462	1.93907	1.55232
346	1.6986	1.61298	1.95749	1.51858
347	1.79777	1.6447	1.87056	1.54204
348	1.81622	1.82698	1.86764	1.42107
349	1.58825	1.58838	1.99227	1.56897
350	1.83343	1.4626	1.97825	1.55062
351	1.64444	1.5869	1.93011	1.54334
352	1.58997	1.57172	1.87438	1.54432
353	1.67991	1.74785	1.63904	1.53298
354	1.76957	1.58371	1.77329	1.64522
355	1.90289	1.5278	2.03248	1.4115
356	1.34526	1.768	1.94346	1.61722
357	1.92915	1.46097	1.69217	1.53325
358	1.88928	1.50202	2.03786	1.43699
359	1.80252	1.68915	1.96649	1.42928
360	1.61707	1.9362	1.87992	1.41499
361	1.84196	1.77743	2.02504	1.61505
362	1.69095	1.79516	1.80842	1.56465
363	1.68526	1.62035	1.78989	1.60092
364	1.72057	1.67847	1.92908	1.62852
365	1.79135	1.56447	1.87918	1.46835
366	1.71663	1.63275	1.75044	1.66382
367	1.76682	1.64093	1.85648	1.58129
368	1.67944	1.73276	1.97248	1.4984
369	1.64021	1.72844	2.01699	1.51212
370	1.76005	1.57375	1.89211	1.56174
371	1.7617	1.50303	1.7888	1.37644
372	1.89801	1.78277	1.97888	1.48733
373	1.67767	1.68341	1.88091	1.50047
374	1.67874	1.7108	1.81738	1.50011
375	1.88456	1.85084	1.83574	1.57036
376	1.65816	1.74865	1.88948	1.42727
377	1.80481	1.84527	1.84475	1.5118
378	1.61571	1.80923	1.80102	1.41736
379	1.85526	1.73389	1.90944	1.41638
380	1.74654	1.64778	1.58941	1.50844
381	1.90644	1.59669	1.89292	1.62177
382	1.64947	1.87169	1.91477	1.33171
383	1.77371	1.84268	1.85686	1.46102
384	1.82057	1.75624	1.99639	1.4833
385	1.81427	1.76673	1.83686	1.4446
386	1.64639	1.31816	1.90013	1.41881
387	1.58374	1.68433	2.088	1.57527
388	1.74052	1.62646	2.03113	1.35297
389	1.90973	1.69606	1.93979	1.5107
390	1.80598	1.8744	1.93097	1.53848
391	1.70149	1.68746	2.00033	1.65623
392	1.7633	1.55027	1.92725	1.61317
393	1.63666	1.69217	1.65161	1.53817
394	1.65448	1.6733	1.71818	1.61807
395	1.84127	1.70476	1.91135	1.53337
396	1.88067	1.4045	1.94966	1.56725
397	1.74803	1.55056	2.00288	1.55991
398	1.77637	1.61709	1.98251	1.55166
399	1.83078	1.57976	1.86501	1.53143
400	1.73635	1.77629	1.70433	1.54419
401	1.82024	1.58323	1.70406	1.4142
402	1.74943	1.59554	1.91946	1.4333
403	1.69845	1.72901	1.91643	1.47353
404	1.8795	1.80484	1.88273	1.55468
405	1.65107	1.55766	1.68052	1.57766
406	1.65338	1.2727	1.8741	1.57051
407	1.81277	1.60284	2.03539	1.44668
408	1.72894	1.74575	1.89571	1.44195
409	1.70188	1.69502	1.80137	1.56367
410	1.6669	1.53383	2.022	1.5385
411	1.80134	1.66119	1.73847	1.50476
412	1.62058	1.78423	1.86361	1.4966
413	1.65239	1.46751	1.76704	1.50926
414	1.72871	1.51488	1.99049	1.43014
415	1.64813	1.8945	1.74967	1.51699
416	1.91586	1.41515	1.9937	1.47741
417	1.87451	1.63048	1.85762	1.39294
418	1.82782	1.74933	1.94819	1.4497
419	1.78925	1.93206	1.94753	1.60341
420	1.69586	1.53802	1.8151	1.43574
421	1.85844	1.70471	1.97684	1.41989
422	1.71802	1.40917	1.90175	1.5786
423	1.75917	1.8029	2.00156	1.44799
424	1.8505	1.65087	2.01374	1.53384
425	1.84576	1.59701	1.92587	1.53779
426	1.69522	1.75343	1.80641	1.44504
427	1.61673	1.80919	1.83794	1.46715
428	1.71345	1.7108	2.10303	1.47352
429	1.77208	1.797	1.92166	1.51304
430	1.59267	1.69294	1.89852	1.51351
431	1.768	1.68241	1.99076	1.59178
432	1.84538	1.62919	1.84813	1.51344
433	1.62509	1.77438	2.00689	1.30424
434	1.61051	1.72108	1.78559	1.50717
435	1.75912	1.71281	1.94408	1.46928
436	1.76063	1.74401	2.04578	1.59099
437	1.71644	1.78013	1.94145	1.43648
438	1.52933	1.79101	1.88883	1.45064
439	1.78492	1.52907	1.96747	1.6101
440	1.62973	1.81469	1.8971	1.53745
441	1.80523	1.73408	1.83624	1.39043
442	1.76056	1.6724	2.03063	1.54683
443	1.67467	1.70536	1.873	1.4891
444	1.63545	1.71562	1.88892	1.665
445	1.87499	1.5762	1.94368	1.65675
446	1.64266	1.74805	1.85963	1.41277
447	1.81513	1.58374	1.89106	1.45146
448	1.77313	1.6344	1.82596	1.42679
449	1.68842	1.60154	1.80369	1.48251
450	1.61047	1.486	1.81222	1.63116
451	1.71413	1.61266	1.89203	1.43725
452	1.81172	1.69632	2.0463	1.4073
453	1.58156	1.72621	2.04934	1.5131
454	1.73277	1.65147	1.94816	1.51196
455	1.82794	1.77707	1.84339	1.52756
456	1.75037	1.81657	2.12306	1.34563
457	1.60955	1.60791	1.96146	1.55448
458	1.66962	1.43961	1.65413	1.5856
459	1.64937	1.74153	1.68847	1.48283
460	1.69145	1.57458	1.71091	1.65453
461	1.73261	1.77803	1.97347	1.49107
462	1.46645	1.66328	1.86208	1.47005
463	1.84916	1.48989	1.89783	1.61818
464	1.70271	1.61766	1.93592	1.41897
465	1.81366	1.7842	1.94945	1.42848
466	1.87028	1.6613	1.77681	1.48524
467	1.84965	1.79999	1.56788	1.56946
468	1.84098	1.66449	1.87283	1.36661
469	1.7308	1.37862	1.91986	1.48894
470	1.68357	1.60193	1.95891	1.53258
471	1.76422	1.69591	1.8329	1.58443
472	1.60199	1.59968	1.84396	1.59029
473	1.55762	1.43899	1.78778	1.53891
474	1.82037	1.89602	1.85754	1.41129
475	1.8123	1.50398	1.9406	1.48006
476	1.58653	1.62741	1.88792	1.3852
477	1.63126	1.4753	1.80911	1.49242
478	1.77332	1.66975	1.88026	1.34352
479	1.87284	1.64605	1.78383	1.53344
480	1.69407	1.71271	2.14787	1.47056
481	1.82691	1.7329	1.79255	1.43318
482	1.73859	1.56947	1.84833	1.45785
483	1.60509	1.67107	1.8165	1.50656
484	1.77678	1.28282	1.94098	1.52231
485	1.58396	1.68201	1.8963	1.65319
486	1.64828	1.79902	1.8964	1.58373
487	1.69056	1.75637	2.0661	1.576
488	1.75305	1.67311	1.94839	1.53619
489	1.6954	1.81156	1.821	1.58026
490	1.78274	1.71868	2.07992	1.50968
491	1.70484	1.54689	1.8933	1.44678
492	1.68344	1.59287	1.83408	1.41991
493	1.69491	1.64909	1.88517	1.5503
494	1.77508	1.76023	1.83467	1.57045
495	1.72049	1.41389	1.8152	1.5274
496	1.65941	1.55057	1.92088	1.5071
497	1.57469	1.63248	1.81565	1.46151
498	1.68573	1.80812	1.79721	1.44592
499	1.59895	1.79746	1.92173	1.5813
500	1.71815	1.46821	1.97013	1.49407
501	1.72221	1.54468	1.84589	1.37397
502	1.73818	1.69285	1.98459	1.51147
503	1.76375	1.9086	1.83197	1.52716
504	1.49862	1.30308	2.0509	1.4612
505	1.76909	1.60287	1.88581	1.48179
506	1.73249	1.88656	1.73559	1.41717
507	1.65765	1.81424	1.7954	1.43981
508	1.7659	1.83875	1.84653	1.63855
509	1.77327	1.6725	1.80416	1.55026
510	1.74003	1.69499	1.68202	1.41268
511	1.56193	1.66289	1.91794	1.49236
512	1.72202	1.75101	1.72208	1.62655
513	1.83026	1.72339	2.03794	1.47971
514	1.69928	1.71038	1.86328	1.35067
515	1.65943	1.32285	1.83911	1.51018
516	1.57113	1.36302	1.73185	1.51267
517	1.75081	1.86212	1.97688	1.46113
518	1.74833	1.72259	1.78206	1.59895
519	1.62044	1.70377	1.94385	1.5626
520	1.74506	1.57762	1.93602	1.56653
521	1.7848	1.71796	1.70934	1.51773
522	1.84325	1.54793	1.9013	1.39514
523	1.83731	1.57403	1.88369	1.49344
524	1.78867	1.55905	1.96891	1.47057
525	1.74586	1.85647	1.93881	1.43167
526	1.72006	1.60063	2.0656	1.48576
527	1.72844	1.65151	1.71205	1.5798
528	1.76502	1.5612	1.87769	1.5969
529	1.76504	1.61362	1.85113	1.4707
530	1.74608	1.61481	1.86749	1.60185
531	1.71635	1.54425	1.8556	1.50774
532	1.74446	1.66315	1.76675	1.56742
533	1.74387	1.53864	1.91653	1.48337
534	1.61047	1.82857	1.93293	1.37474
535	1.78629	1.7217	1.73016	1.45411
536	1.76958	1.71366	1.95853	1.57877
537	1.79116	1.76602	2.00327	1.50227
538	1.7708	1.51129	1.7053	1.37329
539	1.73571	1.57647	1.80529	1.3491
540	1.59585	1.74587	1.71814	1.5213
541	1.5787	1.81976	1.75502	1.59836
542	1.83018	1.4672	1.83677	1.4592
543	1.76689	1.80142	1.8578	1.63299
544	1.6848	1.6953	2.04307	1.55762
545	1.72907	1.64204	1.83317	1.49825
546	1.74045	1.76984	2.08602	1.30157
547	1.80424	1.72979	1.83537	1.46548
548	1.67614	1.67476	1.73011	1.51111
549	1.68425	1.92578	1.85908	1.37516
550	1.71586	1.67241	1.97106	1.58036
551	1.6692	1.30867	1.65204	1.48443
552	1.7169	1.75152	1.89035	1.43038
553	1.68528	1.6693	1.87907	1.34435
554	1.83069	1.71676	1.85615	1.56162
555	1.74226	1.65732	1.78072	1.51102
556	1.58581	1.79922	1.91374	1.42161
557	1.76317	1.57945	1.97289	1.63544
558	1.79642	1.6252	1.83091	1.54296
559	1.63399	1.68853	1.83815	1.5372
560	1.71863	1.8313	2.05143	1.49252
561	1.5987	1.65285	1.63063	1.66949
562	1.69554	1.54306	1.69432	1.61983
563	1.80932	1.67906	1.72479	1.58074
564	1.86511	1.76032	1.84323	1.48413
565	1.84212	1.6689	1.82844	1.55191
566	1.70131	1.73012	1.82146	1.38827
567	1.89846	1.61334	1.84833	1.43888
568	1.84224	1.47661	2.14713	1.50127
569	1.78678	1.59284	1.77906	1.44653
570	1.62402	1.6989	1.87283	1.4133
571	1.71978	1.7809	1.87264	1.5648
572	1.75783	1.60712	1.82763	1.44609
573	1.74957	1.74064	1.73485	1.49304
574	1.81059	1.7755	1.95839	1.48688
575	1.8182	1.60452	1.88709	1.46246
576	1.73277	1.52362	1.90619	1.40361
577	1.67345	1.79842	2.00018	1.46893
578	1.67061	1.73551	1.80946	1.45613
579	1.67993	1.44873	1.85081	1.46099
580	1.81796	1.77673	1.9303	1.50012
581	1.69343	1.81571	2.04788	1.40992
582	1.79971	1.57013	1.94697	1.3693
583	1.6251	1.62969	1.87599	1.50019
584	1.79451	1.62073	1.97871	1.41034
585	1.61309	1.58848	1.84988	1.63163
586	1.74792	1.79537	1.92084	1.51057
587	1.85912	1.44125	1.87277	1.55831
588	1.70023	1.3486	1.89181	1.3649
589	1.81574	1.71065	1.89676	1.44569
590	1.6228	1.63507	1.83366	1.44298
591	1.67472	1.77565	1.88831	1.40637
592	1.90544	1.68419	2.02745	1.48739
593	1.78321	1.556	1.96649	1.47187
594	1.81485	1.68813	1.82256	1.52469
595	1.75173	1.60886	1.84841	1.50174
596	1.72679	1.61726	1.95992	1.44521
597	1.77382	1.57698	1.90755	1.50242
598	1.76049	1.73854	1.99075	1.51871
599	1.80569	1.46806	1.99864	1.58341
600	1.76492	1.68196	1.86878	1.42522
601	1.72513	1.55374	1.7742	1.57528
602	1.8299	1.6327	1.95107	1.57521
603	1.8171	1.61866	1.91502	1.61282
604	1.72051	1.54505	1.91572	1.53602
605	1.79165	1.66365	1.89249	1.58105
606	1.61166	1.85858	1.91998	1.51872
607	1.66219	1.68428	1.72886	1.5663
608	1.66131	1.67264	1.82085	1.51611
609	1.78602	1.64361	1.77609	1.45884
610	1.69831	1.73944	1.92816	1.65727
611	1.83515	1.50844	2.01792	1.38505
612	1.65833	1.59342	1.9229	1.37697
613	1.82425	1.62308	1.69842	1.49603
614	1.78359	1.72702	1.79994	1.62585
615	1.69312	1.60305	1.74241	1.55885
616	1.80928	1.75777	1.96865	1.64679
617	1.73828	1.44681	1.81995	1.62615
618	1.80755	1.52685	1.84072	1.54435
619	1.74976	1.74758	1.9887	1.61906
620	1.63683	1.57967	1.86023	1.41769
621	1.66963	1.78154	1.73889	1.47238
622	1.75234	1.74956	1.81196	1.56693
623	1.75969	1.71114	1.73783	1.40722
624	1.76446	1.61039	1.75934	1.53468
625	1.68251	1.69087	1.78938	1.46297
626	1.80489	1.57567	1.69221	1.41495
627	1.75578	1.65093	1.85564	1.46394
628	1.61189	1.67436	2.08937	1.53016
629	1.91947	1.67482	1.9142	1.52041
630	1.70506	1.42269	2.00623	1.46077
631	1.79432	1.66537	1.95663	1.43466
632	1.80728	1.55822	1.96025	1.33001
633	1.86163	1.73966	1.87598	1.39044
634	1.6693	1.49947	1.89995	1.52306
635	1.78392	1.68201	2.05771	1.5101
636	1.79917	1.72534	2.01286	1.58144
637	1.85543	1.4612	1.57226	1.48753
638	1.60327	1.64058	1.99326	1.4644
639	1.89102	1.55591	1.75904	1.48883
640	1.82208	1.67944	2.05516	1.4595
641	1.77056	1.67006	2.03989	1.45035
642	1.67529	1.67139	1.71915	1.59567
643	1.68185	1.8371	1.73691	1.48226
644	1.72363	1.74705	1.99624	1.49988
645	1.64539	1.71677	1.97033	1.5085
646	1.80038	1.5744	2.00846	1.37497
647	1.71662	1.6966	1.82875	1.47683
648	1.78444	1.6442	2.0077	1.45703
649	1.78346	1.82634	1.72442	1.52945
650	1.79254	1.63398	1.84405	1.49817
651	1.60826	1.5937	1.79441	1.63377
652	1.82947	1.82244	1.9516	1.52657
653	1.8262	1.63354	1.85672	1.55901
654	1.63314	1.60705	1.9173	1.56091
655	1.68283	1.63189	1.87197	1.43146
656	1.65804	1.55865	1.9437	1.57511
657	1.69406	1.74567	1.95217	1.50006
658	1.59143	1.58368	1.98629	1.51983
659	1.72028	1.72573	1.99362	1.46934
660	1.77599	1.63644	1.80275	1.36143
661	1.62002	1.79683	1.90716	1.45095
662	1.61732	1.68454	1.89488	1.41792
663	1.82439	1.79181	1.71797	1.6151
664	1.64209	1.75356	1.93383	1.47431
665	1.82168	1.60072	1.77272	1.53768
666	1.74872	1.6366	1.89845	1.48262
667	1.70016	1.46357	1.94917	1.55905
668	1.66891	1.67321	1.98605	1.60956
669	1.70859	1.7067	1.60423	1.5023
670	1.7026	1.44135	2.05425	1.52549
671	1.49843	1.57602	1.91535	1.5098
672	1.62458	1.77119	1.87055	1.4612
673	1.62579	1.75575	2.01223	1.5588
674	1.81013	1.43956	1.78424	1.5382
675	1.85798	1.61787	1.6446	1.49938
676	1.68328	1.54251	1.91877	1.46513
677	1.74616	1.72313	1.99543	1.45201
678	1.77504	1.46986	1.94794	1.54371
679	1.66378	1.34147	2.09844	1.49624
680	1.70184	1.4973	1.84971	1.64342
681	1.85818	1.71097	1.91355	1.53114
682	1.72615	1.72767	1.87277	1.44957
683	1.72205	1.65403	1.82948	1.398
684	1.85211	1.86322	1.81201	1.46145
685	1.70574	1.65194	1.85779	1.44095
686	1.87822	1.57009	2.06397	1.5281
687	1.79592	1.6908	1.88062	1.56948
688	1.56954	1.54458	1.88701	1.55914
689	1.77643	1.46457	1.88938	1.51949
690	1.57713	1.81417	1.72137	1.4689
691	1.80807	1.62395	1.78905	1.57747
692	1.80273	1.75737	1.91264	1.51583
693	1.74255	1.66122	1.7929	1.53801
694	1.65588	1.57862	1.91939	1.39016
695	1.91187	1.83202	1.95972	1.42436
696	1.76524	1.51021	2.0453	1.52518
697	1.59625	1.77456	1.79482	1.56368
698	1.54317	1.39278	1.74586	1.43174
699	1.75071	1.64169	1.96144	1.62301
700	1.7576	1.83588	2.00362	1.61732
701	1.84627	1.62506	1.89605	1.4523
702	1.58042	1.63982	2.10774	1.52256
703	1.7983	1.73592	1.77344	1.538
704	1.64808	1.65145	1.9041	1.40929
705	1.65056	1.5475	1.84834	1.48379
706	1.82498	1.60662	1.91879	1.56471
707	1.79882	1.8121	1.87651	1.52712
708	1.77568	1.78317	1.7157	1.38376
709	1.7764	1.50835	1.80921	1.37203
710	1.7556	1.49572	2.02235	1.58439
711	1.77284	1.72602	1.81579	1.44812
712	1.796	1.85748	1.95624	1.33871
713	1.73085	1.61933	1.70401	1.61524
714	1.71815	1.73575	1.90897	1.62847
715	1.87061	1.91264	1.8442	1.56403
716	1.70947	1.59722	1.66664	1.58013
717	1.78085	1.73157	2.0537	1.53196
718	1.74778	1.56531	1.90624	1.51305
719	1.68692	1.64414	1.97735	1.57299
720	1.75531	1.44419	1.70664	1.61994
721	1.6409	1.5887	1.89323	1.6216
722	1.94117	1.52892	1.85535	1.52711
723	1.66282	1.52982	1.91018	1.35399
724	1.71736	1.76382	2.0073	1.50987
725	1.83364	1.76609	2.02217	1.39473
726	1.72534	1.29252	1.87054	1.51835
727	1.71895	1.70253	1.97917	1.5514
728	1.70874	1.66845	1.8909	1.41037
729	1.76118	1.91169	1.92385	1.47847
730	1.72505	1.36897	1.83679	1.47625
731	1.66667	1.81684	1.92629	1.41408
732	1.57001	1.73515	1.95885	1.53254
733	1.67765	1.77602	1.81624	1.41245
734	1.68258	1.75231	1.84055	1.44976
735	1.72232	1.4414	1.8227	1.60883
736	1.77191	1.7005	1.68586	1.5945
737	1.73454	1.52045	1.94395	1.44693
738	1.69579	1.90509	1.94853	1.5783
739	1.78258	1.48128	1.96247	1.4395
740	1.65775	1.67087	1.95867	1.48622
741	1.80201	1.43786	2.04786	1.51586
742	1.70635	1.80178	1.98644	1.62775
743	1.7332	1.7889	2.05305	1.59187
744	1.68074	1.78048	1.84004	1.37422
745	1.62605	1.50939	1.7567	1.54541
746	1.73951	1.87593	1.84037	1.42689
747	1.53982	1.46745	1.81895	1.41311
748	1.7752	1.55574	1.94858	1.44029
749	1.86029	1.19423	1.92422	1.57589
750	1.74981	1.81949	1.96374	1.46071
751	1.68466	1.57335	1.97512	1.50454
752	1.85783	1.67211	1.93658	1.4665
753	1.821	1.58006	1.87724	1.48833
754	1.78818	1.62983	1.75541	1.45663
755	1.63798	1.58867	2.06927	1.61606
756	1.71864	1.52312	1.70531	1.47757
757	1.95111	1.80757	1.88197	1.4561
758	1.79966	1.60706	1.99827	1.45308
759	1.93042	1.662	1.93	1.45208
760	1.59468	1.67073	1.97138	1.49397
761	1.77882	1.87232	1.7602	1.54448
762	1.69081	1.47443	2.01097	1.53736
763	1.75572	1.82635	1.85489	1.60092
764	1.75664	1.72487	1.93716	1.62201
765	1.57577	1.70414	1.89672	1.43707
766	1.79664	1.72205	1.94286	1.48649
767	1.71166	1.52096	1.72284	1.5633
768	1.74442	1.70973	2.03586	1.50759
769	1.7902	1.72083	1.70756	1.52511
770	1.74017	1.96458	1.848	1.45918
771	1.67046	1.70141	1.97676	1.3917
772	1.74541	1.52391	1.89517	1.57082
773	1.73408	1.84151	2.0486	1.49855
774	1.76581	1.50523	1.93456	1.46742
775	1.68646	1.56737	1.98807	1.53367
776	1.72371	1.65734	1.805	1.54402
777	1.82679	1.71149	1.6658	1.56154
778	1.7869	1.76272	1.95653	1.52839
779	1.80256	1.56468	1.8766	1.49948
780	1.78954	1.91302	1.89205	1.39883
781	1.72502	1.69139	1.9107	1.59042
782	1.74225	1.74632	1.6869	1.51122
783	1.88914	1.62534	1.96165	1.43127
784	1.76285	1.72	1.89799	1.52973
785	1.64521	1.62242	1.8316	1.41675
786	1.70633	1.84087	2.03554	1.41354
787	1.40361	1.64501	2.0397	1.54673
788	1.71908	1.50869	1.75976	1.46691
789	1.71286	1.78721	1.89852	1.57954
790	1.85675	1.74661	1.76727	1.47872
791	1.61098	1.58657	1.99898	1.50475
792	1.793	1.68057	1.9342	1.46486
793	1.66712	1.43255	1.82388	1.4126
794	1.71894	1.42775	2.09704	1.50601
795	1.76941	1.60844	1.99173	1.45447
796	1.89891	1.41686	1.95476	1.60259
797	1.7098	1.9022	1.81175	1.40163
798	1.70565	1.49594	1.80718	1.50551
799	1.64578	1.78761	1.78521	1.67381
800	1.77309	1.80106	1.96964	1.47272
801	1.89461	1.77975	1.86399	1.51138
802	1.85227	1.6098	2.02211	1.52457
803	1.70292	1.64989	1.82825	1.59947
804	1.67996	1.80409	1.67527	1.46919
805	1.46864	1.5715	1.94929	1.54247
806	1.7744	1.60175	2.04905	1.5026
807	1.67816	1.67519	1.80006	1.55722
808	1.87448	1.71784	1.9629	1.45778
809	1.71581	1.71252	1.86512	1.54492
810	1.79434	1.57533	1.86403	1.53903
811	1.68007	1.64125	1.8816	1.504
812	1.70609	1.70293	1.83008	1.60287
813	1.67361	1.35459	1.90551	1.60232
814	1.7481	1.73581	1.83024	1.53745
815	1.74298	1.71521	1.90278	1.53111
816	1.82262	1.46069	1.6789	1.46935
817	1.65468	1.44558	1.93201	1.48735
818	1.71201	1.55887	1.87461	1.43943
819	1.64992	1.47338	1.92944	1.45185
820	1.80888	1.68181	1.84833	1.4143
821	1.75653	1.86675	1.99433	1.54195
822	1.72191	1.55484	2.02302	1.39143
823	1.78471	1.60867	1.86011	1.56832
824	1.81222	1.68886	2.00761	1.63473
825	1.86336	1.61289	1.83841	1.2421
826	1.64883	1.69717	1.94315	1.45173
827	1.72576	1.60955	2.01879	1.6607
828	1.77307	1.77698	2.04368	1.40746
829	1.75757	1.61133	1.91615	1.42209
830	1.7417	1.63355	1.92219	1.48733
831	1.68639	1.59451	1.76779	1.53216
832	1.77689	1.47834	1.9061	1.44377
833	1.70204	1.70163	1.69097	1.57162
834	1.81111	1.76	1.893	1.42602
835	1.64303	1.71728	1.90903	1.49205
836	1.78085	1.69113	1.88251	1.57458
837	1.6529	1.62065	1.92187	1.56844
838	1.67118	1.80331	1.77841	1.41771
839	1.46818	1.21383	1.97585	1.61127
840	1.70804	1.72558	1.82797	1.59139
841	1.75372	1.76781	2.05931	1.54415
842	1.8792	1.44942	2.08324	1.46158
843	1.84649	1.80094	1.98854	1.46245
844	1.62463	1.6043	1.97692	1.44079
845	1.79986	1.79049	1.84129	1.51953
846	1.78224	1.81936	1.83502	1.56828
847	1.54387	1.48388	1.92872	1.49483
848	1.84841	1.75486	1.73322	1.55458
849	1.82017	1.74442	1.8887	1.50805
850	1.73837	1.59613	1.69315	1.41797
851	1.70091	1.42061	1.92241	1.48041
852	1.66946	1.73232	1.80507	1.43856
853	1.7893	1.39938	1.91125	1.37903
854	1.67499	1.61112	1.88218	1.42703
855	1.91568	1.72769	1.98673	1.54401
856	1.82247	1.84224	1.74661	1.60293
857	1.78062	1.7363	1.86857	1.57278
858	1.76389	1.8064	1.74623	1.50277
859	1.7499	1.73245	1.90438	1.4268
860	1.86595	1.58671	1.89739	1.58229
861	1.78133	1.51337	2.05368	1.55977
862	1.62481	1.52471	1.94704	1.5533
863	1.64622	1.66031	1.74851	1.5029
864	1.75315	1.3621	1.74027	1.40399
865	1.69496	1.67295	1.86454	1.46856
866	1.64363	1.87957	1.99653	1.42601
867	1.72352	1.70745	1.99113	1.38749
868	1.67485	1.43073	1.86204	1.4331
869	1.78154	1.53217	1.95574	1.56164
870	1.70628	1.84991	1.77521	1.43933
871	1.84153	1.76964	1.96468	1.35858
872	1.73082	1.6749	1.98241	1.47126
873	1.68553	1.75858	1.79895	1.5184
874	1.66421	1.82986	1.98686	1.45458
875	1.87526	1.73883	1.87986	1.49706
876	1.76446	1.75411	1.84618	1.41307
877	1.77403	1.76117	1.81983	1.60018
878	1.76703	1.64868	1.89591	1.51928
879	1.7358	1.71277	1.80109	1.45747
880	1.86947	1.79149	1.87413	1.45483
881	1.63361	1.42755	1.84315	1.49125
882	1.5983	1.6839	1.89474	1.47662
883	1.82276	1.7235	1.92042	1.48733
884	1.72405	1.75315	1.98271	1.53975
885	1.83155	1.56369	1.92066	1.31808
886	1.57301	1.72445	1.83813	1.34443
887	1.75401	1.58503	2.03416	1.52268
888	1.74519	1.68369	1.8043	1.4954
889	1.92784	1.72084	1.88819	1.46324
890	1.72834	1.54195	1.73872	1.53941
891	1.60108	1.35639	1.86117	1.42101
892	1.67284	1.82747	1.81721	1.56015
893	1.67044	1.62626	1.78735	1.50926
894	1.80764	1.5435	1.70136	1.46656
895	1.72889	1.61748	1.81035	1.49674
896	1.62833	1.42629	1.77718	1.42288
897	1.77554	1.84237	2.03056	1.49953
898	1.71059	1.51589	2.04156	1.5106
899	1.7605	1.60583	1.71939	1.73583
900	1.66773	1.53292	1.76206	1.38493
901	1.62327	1.71818	1.93392	1.50929
902	1.68373	1.49993	1.83385	1.48991
903	1.73906	1.50048	1.75539	1.51347
904	1.71526	1.74781	1.83917	1.41799
905	1.67987	1.81306	1.9746	1.49667
906	1.53588	1.72475	1.87978	1.51461
907	1.77922	1.5811	2.02361	1.4952
908	1.83458	1.65117	1.7698	1.53639
909	1.71201	1.61633	2.0335	1.65402
910	1.79731	1.87688	1.85154	1.32536
911	1.58052	1.71191	1.82235	1.55988
912	1.61433	1.7669	1.94287	1.50584
913	1.69335	1.74101	1.70303	1.41704
914	1.44408	1.72865	1.81092	1.61055
915	1.7578	1.72039	1.89597	1.42151
916	1.65258	1.69973	1.93048	1.45061
917	1.67137	1.65508	1.96042	1.45875
918	2.03727	1.61941	1.91873	1.39336
919	1.71862	1.66129	1.90519	1.55013
920	1.82	1.87553	1.74535	1.51477
921	1.71052	1.65327	1.74347	1.51117
922	1.69438	1.37482	1.91579	1.38756
923	1.70697	1.44644	1.89194	1.57247
924	1.69768	1.57162	1.7703	1.50559
925	1.64972	1.432	1.79702	1.57239
926	1.57197	1.37988	1.90657	1.34437
927	1.7231	1.63365	1.90615	1.44933
928	1.7486	1.46632	1.97764	1.62164
929	1.82906	1.8309	1.98218	1.48782
930	1.76247	1.51582	1.87385	1.45274
931	1.82647	1.71732	1.94796	1.6425
932	1.74458	1.55854	1.8009	1.52304
933	1.75635	1.57426	1.84935	1.55408
934	1.75433	1.60277	1.93959	1.48984
935	1.745	1.67404	1.69579	1.58533
936	1.82667	1.75681	1.9044	1.54822
937	1.65898	1.3789	1.92941	1.59308
938	1.80249	1.73587	1.80527	1.49697
939	1.83059	1.6761	2.03585	1.71562
940	1.86474	1.68228	1.91076	1.51424
941	1.7456	1.68963	1.80711	1.49769
942	1.63311	1.58737	1.78383	1.49959
943	1.77966	1.44283	1.80379	1.50262
944	1.89972	1.68443	1.97109	1.45296
945	1.60184	1.71818	1.93732	1.59181
946	1.69267	1.65075	1.64745	1.47909
947	1.68359	1.85098	2.06844	1.4132
948	1.71357	1.71072	1.96688	1.46719
949	1.65433	1.53442	2.02393	1.56062
950	1.83908	1.70313	1.90295	1.59708
951	1.72361	1.77433	1.91452	1.42245
952	1.60364	1.70983	1.81104	1.41684
953	1.7188	1.70812	1.95819	1.58435
954	1.80709	1.61909	1.79739	1.5352
955	1.7688	1.66377	1.85333	1.47949
956	1.67456	1.64003	1.8578	1.56195
957	1.78599	1.99254	1.9841	1.47389
958	1.7131	1.67875	2.12559	1.51263
959	1.58594	1.70849	1.78766	1.53542
960	1.75828	1.64577	1.88166	1.60208
961	1.54612	1.59722	1.98233	1.4696
962	1.72923	1.59844	1.82056	1.37272
963	1.83856	1.71536	1.9212	1.44784
964	1.65919	1.76166	1.72829	1.43133
965	1.67381	1.7069	2.09792	1.49954
966	1.84688	1.44371	1.90027	1.54534
967	1.76064	1.78816	1.76309	1.50646
968	1.76839	1.74481	1.91489	1.51801
969	1.80821	1.55354	1.75117	1.53306
970	1.75772	1.49177	1.85627	1.40715
971	1.65337	1.48488	2.02218	1.57511
972	1.69281	1.87072	1.92736	1.49653
973	1.68277	1.6257	1.76625	1.57019
974	1.6814	1.50049	2.0628	1.55634
975	1.505	1.68087	1.85105	1.46564
976	1.90053	1.59342	1.92176	1.55857
977	1.78406	1.34848	2.04305	1.50311
978	1.81686	1.73251	1.75449	1.36543
979	1.63869	1.67232	1.83772	1.46235
980	1.80267	1.69207	1.88756	1.45696
981	1.70817	1.84422	1.82807	1.46456
982	1.67598	1.83312	1.75316	1.5051
983	1.82942	1.72796	1.65344	1.576
984	1.57716	1.67335	1.84183	1.53644
985	1.76886	1.61074	1.78492	1.53367
986	1.94358	1.60391	1.90093	1.41681
987	1.56477	1.87047	1.90695	1.57983
988	1.76913	1.71194	2.00489	1.49761
989	1.81889	1.6114	2.05971	1.39598
990	1.803	1.51767	1.8971	1.63016
991	1.78952	1.50346	2.04757	1.61674
992	1.76608	1.74013	1.89263	1.51044
993	1.67591	1.60598	1.72747	1.48439
994	1.74186	1.41763	1.78527	1.52639
995	1.73101	1.58527	1.87319	1.49012
996	1.82658	1.69082	1.83888	1.46697
997	1.8423	1.6799	1.87458	1.41622
998	1.75361	1.57316	1.92723	1.53478
999	1.81627	1.7753	1.82107	1.45801
1000	1.65583	1.65418	1.95439	1.55837
