# Supplementary material for: The Occurrence of Mycotoxins in Raw Materials and Fish Feeds in Europe and the Potential Effects of Deoxynivalenol (DON) on the Health and Growth of Farmed Fish Species—A Review
Source: Toxins (Basel). 2021 Jun 5;13(6):403. doi: 10.3390/toxins13060403 (PMC8226812; doi:10.3390/toxins13060403)
Supplement: Supplementary file 1 [file toxins-13-00403-s001.zip › Table S7. Summary of DON studies used for the meta-analysis.xlsx]

## Sheet: Sheet1
Table S7. Summary of DON studies used for the meta-analysis.
Species	Toxin	Experimental set-up	Exposure time (days)	Type of DON	Application mode	Doses (μg/kg)	Replicates per dose	Number of animals per dose	Age	Initial Body weight (g)	Final Body weight (g)	Median Body Weight (g)	Feeding strategy	Feeding frequency (times/day)	Feeding level	Total Feed intake (g)	Feed intake (% of the control)	ΔFI % reduction (relative to the control)	Mean Daily Feed intake (g / fish)	Mean Daily Feed intake (% of the control)	ΔDFI % reduction (relative to the control)	Weight gain (g)	Growth (g/day)	Growth % (relative to the control)	ΔGrowth reduction % (relative to the control)	Feed efficiency (FE)	FE (% of the control)	ΔFE % reduction (relative to the control)	Estimated daily DON intake (EDI) μg/gBW/day	Remarks	Author	Year	Journal	Publication title
Atlantic salmon (Salmo salar)	DON	in-vivo	56	Non-Challenged	Feed	0	2	50	Post-smolt (12 months)	57.7	123.2	90.45	Satiation	3	slight excess of the expected voluntary feed intake	4256	100	0	1.52	100	0	65.5	1.16964	100	0	0.769502	100	0	0		Bernhoft et al.	2017	Food Additives and Contaminants - Part A Chemistry, Analysis, Control, Exposure and Risk Assessment	Tissue distribution and elimination of deoxynivalenol and ochratoxin A in dietary-exposed Atlantic salmon (Salmo salar)
Atlantic salmon (Salmo salar)	DON	in-vivo	56	Pure	Feed	2000	2	50	Post-smolt (12 months)	57.6	114.8	86.2	Satiation	3	slight excess of the expected voluntary feed intake	3948	92.7632	-7.23684	1.41	92.7632	-7.23684	57.2	1.02143	87.3282	-12.6718	0.724417	94.1411	-5.85891	0.0327146		Bernhoft et al.	2017	Food Additives and Contaminants - Part A Chemistry, Analysis, Control, Exposure and Risk Assessment	Tissue distribution and elimination of deoxynivalenol and ochratoxin A in dietary-exposed Atlantic salmon (Salmo salar)
Atlantic salmon (Salmo salar)	DON	in-vivo	56	Pure	Feed	6000	2	50	Post-smolt (12 months)	58.8	80.2	69.5	Satiation	3	slight excess of the expected voluntary feed intake	2408	56.5789	-43.4211	0.86	56.5789	-43.4211	21.4	0.382143	32.6718	-67.3282	0.444352	57.7454	-42.2546	0.0742446		Bernhoft et al.	2017	Food Additives and Contaminants - Part A Chemistry, Analysis, Control, Exposure and Risk Assessment	Tissue distribution and elimination of deoxynivalenol and ochratoxin A in dietary-exposed Atlantic salmon (Salmo salar)
Atlantic salmon (Salmo salar)	DON	in-vivo	21	Non-Challenged	Feed	0	2	50	Post-smolt (12 months)	57.7	75.2	66.45	Satiation	3	slight excess of the expected voluntary feed intake	945	100	0	0.9	100	0	17.5	0.833333	100	0	0.925926	100	0	0		Bernhoft et al.	2017	Food Additives and Contaminants - Part A Chemistry, Analysis, Control, Exposure and Risk Assessment	Tissue distribution and elimination of deoxynivalenol and ochratoxin A in dietary-exposed Atlantic salmon (Salmo salar)
Atlantic salmon (Salmo salar)	DON	in-vivo	21	Pure	Feed	2000	2	50	Post-smolt (12 months)	57.6	70.2	63.9	Satiation	3	slight excess of the expected voluntary feed intake	840	88.8889	-11.1111	0.8	88.8889	-11.1111	12.6	0.6	72	-28	0.75	81	-19	0.0250391		Bernhoft et al.	2017	Food Additives and Contaminants - Part A Chemistry, Analysis, Control, Exposure and Risk Assessment	Tissue distribution and elimination of deoxynivalenol and ochratoxin A in dietary-exposed Atlantic salmon (Salmo salar)
Atlantic salmon (Salmo salar)	DON	in-vivo	21	Pure	Feed	6000	2	50	Post-smolt (12 months)	58.8	63.7	61.25	Satiation	3	slight excess of the expected voluntary feed intake	514.5	54.4444	-45.5556	0.49	54.4444	-45.5556	4.9	0.233333	28	-72	0.47619	51.4286	-48.5714	0.048		Bernhoft et al.	2017	Food Additives and Contaminants - Part A Chemistry, Analysis, Control, Exposure and Risk Assessment	Tissue distribution and elimination of deoxynivalenol and ochratoxin A in dietary-exposed Atlantic salmon (Salmo salar)
Atlantic salmon (Salmo salar)	DON	in-vivo	42	Non-Challenged	Feed	0	2	50	Post-smolt (12 months)	57.7	99.1	78.4	Satiation	3	slight excess of the expected voluntary feed intake	2205	100	0	1.05	100	0	41.4	0.985714	100	0	0.938776	100	0	0		Bernhoft et al.	2017	Food Additives and Contaminants - Part A Chemistry, Analysis, Control, Exposure and Risk Assessment	Tissue distribution and elimination of deoxynivalenol and ochratoxin A in dietary-exposed Atlantic salmon (Salmo salar)
Atlantic salmon (Salmo salar)	DON	in-vivo	42	Pure	Feed	2000	2	50	Post-smolt (12 months)	57.6	95.6	76.6	Satiation	3	slight excess of the expected voluntary feed intake	2142	97.1429	-2.85714	1.02	97.1429	-2.85714	38	0.904762	91.7874	-8.21256	0.887021	94.4871	-5.51293	0.0266319		Bernhoft et al.	2017	Food Additives and Contaminants - Part A Chemistry, Analysis, Control, Exposure and Risk Assessment	Tissue distribution and elimination of deoxynivalenol and ochratoxin A in dietary-exposed Atlantic salmon (Salmo salar)
Atlantic salmon (Salmo salar)	DON	in-vivo	42	Pure	Feed	6000	2	50	Post-smolt (12 months)	58.8	72.1	65.45	Satiation	3	slight excess of the expected voluntary feed intake	1323	60	-40	0.63	60	-40	13.3	0.316667	32.1256	-67.8744	0.502646	53.5427	-46.4573	0.057754		Bernhoft et al.	2017	Food Additives and Contaminants - Part A Chemistry, Analysis, Control, Exposure and Risk Assessment	Tissue distribution and elimination of deoxynivalenol and ochratoxin A in dietary-exposed Atlantic salmon (Salmo salar)
Atlantic salmon (Salmo salar)	DON	in-vivo	56	Non-Challenged	Feed	0	2	50	12-month-old salmon	58	123.2	90.6	Satiation	3	Satiation	2507.69	100	0	0.895604	100	0	65.2	1.16429	100	0	1.3	100	0	0	Feed intake was calculated by using data of FE and final-initial BW (growth)	Moldal et al.	2018	Toxins	Dietary Deoxynivalenol (DON) May Impair the Epithelial Barrier and Modulate the Cytokine Signaling in the Intestine of Atlantic Salmon (Salmo salar)
Atlantic salmon (Salmo salar)	DON	in-vivo	56	Pure	Feed	5500	2	50	12-month-old salmon	58	80.2	69.1	Satiation	3	Satiation	1387.5	55.3298	-44.6702	0.495536	55.3298	-44.6702	22.2	0.396429	34.0491	-65.9509	0.8	61.5385	-38.4615	0.0394421	Feed intake was calculated by using data of FE and final-initial BW (growth)	Moldal et al.	2018	Toxins	Dietary Deoxynivalenol (DON) May Impair the Epithelial Barrier and Modulate the Cytokine Signaling in the Intestine of Atlantic Salmon (Salmo salar)
Rainbow trout (Oncorhynchus mykiss)	DON	in-vivo	56	Non-Challenged	Feed	300	3	36	Juveniles	24	120.2	72.1	Satiation	3	Satiation	2973.6	100	0	1.475	100	0	96.2	1.71786	100	0	1.16	100	0	0.00613731	*Apart from DON, small quantities of 15-acetyl DON (15-ADON) and Zearalenone (ZON) were present. **Control diet was not 100% mycotoxins-free ***Total feed intake is an estimation based on Daily feed intake	Hooft et al.	2011	Aquaculture	Rainbow trout (Oncorhynchus mykiss) is extremely sensitive to the feed-borne Fusarium mycotoxin deoxynivalenol (DON)
Rainbow trout (Oncorhynchus mykiss)	DON	in-vivo	56	Natural	Feed	800	3	36	Juveniles	24	101.6	62.8	Satiation	3	Satiation	2408.4	80.9927	-19.0073	1.19464	80.9927	-19.0073	77.6	1.38571	80.6653	-19.3347	1.16	100	0	0.0152184	*Apart from DON, small quantities of 15-acetyl DON (15-ADON) and Zearalenone (ZON) were present. **Control diet was not 100% mycotoxins-free ***Total feed intake is an estimation based on Daily feed intake	Hooft et al.	2011	Aquaculture	Rainbow trout (Oncorhynchus mykiss) is extremely sensitive to the feed-borne Fusarium mycotoxin deoxynivalenol (DON)
Rainbow trout (Oncorhynchus mykiss)	DON	in-vivo	56	Natural	Feed	1400	3	36	Juveniles	24	85.9	54.95	Satiation	3	Satiation	2034	68.4019	-31.5981	1.00893	68.4019	-31.5981	61.9	1.10536	64.3451	-35.6549	1.09	93.9655	-6.03448	0.0257052	*Apart from DON, small quantities of 15-acetyl DON (15-ADON) and Zearalenone (ZON) were present. **Control diet was not 100% mycotoxins-free ***Total feed intake is an estimation based on Daily feed intake	Hooft et al.	2011	Aquaculture	Rainbow trout (Oncorhynchus mykiss) is extremely sensitive to the feed-borne Fusarium mycotoxin deoxynivalenol (DON)
Rainbow trout (Oncorhynchus mykiss)	DON	in-vivo	56	Natural	Feed	2000	3	36	Juveniles	24	77.4	50.7	Satiation	3	Satiation	1771.2	59.5642	-40.4358	0.878571	59.5642	-40.4358	53.4	0.953571	55.5094	-44.4906	1.09	93.9655	-6.03448	0.0346577	*Apart from DON, small quantities of 15-acetyl DON (15-ADON) and Zearalenone (ZON) were present. **Control diet was not 100% mycotoxins-free ***Total feed intake is an estimation based on Daily feed intake	Hooft et al.	2011	Aquaculture	Rainbow trout (Oncorhynchus mykiss) is extremely sensitive to the feed-borne Fusarium mycotoxin deoxynivalenol (DON)
Rainbow trout (Oncorhynchus mykiss)	DON	in-vivo	56	Natural	Feed	2600	3	36	Juveniles	24	62.9	43.45	Satiation	3	Satiation	1569.6	52.7845	-47.2155	0.778571	52.7845	-47.2155	38.9	0.694643	40.4366	-59.5634	0.89	76.7241	-23.2759	0.0465889	*Apart from DON, small quantities of 15-acetyl DON (15-ADON) and Zearalenone (ZON) were present. **Control diet was not 100% mycotoxins-free ***Total feed intake is an estimation based on Daily feed intake	Hooft et al.	2011	Aquaculture	Rainbow trout (Oncorhynchus mykiss) is extremely sensitive to the feed-borne Fusarium mycotoxin deoxynivalenol (DON)
Rainbow trout (Oncorhynchus mykiss)	DON	in-vivo	84	Non-Challenged	Feed	300	3	150	Fingerlings	1.8	36.3	19.05	Satiation	3	Satiation	4755	100	0	0.377381	100	0	34.5	0.410714	100	0	1.09	100	0	0.00594301	*Apart from DON, Zearalenone (ZEN) was present. **Control diet was not 100% mycotoxins-free ***Total feed intake is an estimation based on Daily feed intake	Hooft et al.	2017	Aquaculture	Evaluation of the efficacy of a commercial feed additive against the adverse effects of feed-borne deoxynivalenol (DON) on the performance of rainbow trout (Oncorhynchus mykiss)
Rainbow trout (Oncorhynchus mykiss)	DON	in-vivo	84	Natural	Feed	1000	3	150	Fingerlings	1.8	29.6	15.7	Satiation	3	Satiation	3735	78.5489	-21.4511	0.296429	78.5489	-21.4511	27.8	0.330952	80.5797	-19.4203	1.12	102.752	2.75229	0.0188808	*Apart from DON, Zearalenone (ZEN) was present. **Control diet was not 100% mycotoxins-free ***Total feed intake is an estimation based on Daily feed intake	Hooft et al.	2017	Aquaculture	Evaluation of the efficacy of a commercial feed additive against the adverse effects of feed-borne deoxynivalenol (DON) on the performance of rainbow trout (Oncorhynchus mykiss)
Rainbow trout (Oncorhynchus mykiss)	DON	in-vivo	84	Natural	Feed	1500	3	150	Fingerlings	1.8	22.8	12.3	Satiation	3	Satiation	2790	58.6751	-41.3249	0.221429	58.6751	-41.3249	21	0.25	60.8696	-39.1304	1.12	102.752	2.75229	0.0270035	*Apart from DON, Zearalenone (ZEN) was present. **Control diet was not 100% mycotoxins-free ***Total feed intake is an estimation based on Daily feed intake	Hooft et al.	2017	Aquaculture	Evaluation of the efficacy of a commercial feed additive against the adverse effects of feed-borne deoxynivalenol (DON) on the performance of rainbow trout (Oncorhynchus mykiss)
Rainbow trout (Oncorhynchus mykiss)	DON	in-vivo	84	Natural	Feed	2000	3	150	Fingerlings	1.8	19.7	10.75	Satiation	3	Satiation	2490	52.3659	-47.6341	0.197619	52.3659	-47.6341	17.9	0.213095	51.8841	-48.1159	1.07	98.1651	-1.83486	0.0367663	*Apart from DON, Zearalenone (ZEN) was present. **Control diet was not 100% mycotoxins-free ***Total feed intake is an estimation based on Daily feed intake	Hooft et al.	2017	Aquaculture	Evaluation of the efficacy of a commercial feed additive against the adverse effects of feed-borne deoxynivalenol (DON) on the performance of rainbow trout (Oncorhynchus mykiss)
Rainbow trout (Oncorhynchus mykiss)	DON	in-vivo	56	Non-Challenged	Feed	0	3	54	Juveniles	50.3	194.3	122.3	Satiation	3	Satiation	7441.2	100	0	2.46071	100	0	144	2.57143	100	0	1.06	100	0	0	Total feed intake is an estimation based on Daily feed intake	Hooft et al.	2019a	Aquaculture	The effects of naturally occurring or purified deoxynivalenol (DON) on growth performance, nutrient utilization and histopathology of rainbow trout (Oncorhynchus mykiss)
Rainbow trout (Oncorhynchus mykiss)	DON	in-vivo	56	Pure	Feed	700	3	54	Juveniles	50.3	182.7	116.5	Satiation	3	Satiation	6863.4	92.2351	-7.76488	2.26964	92.2351	-7.76488	132.4	2.36429	91.9444	-8.05556	1.03	97.1698	-2.83019	0.0136373	Total feed intake is an estimation based on Daily feed intake	Hooft et al.	2019a	Aquaculture	The effects of naturally occurring or purified deoxynivalenol (DON) on growth performance, nutrient utilization and histopathology of rainbow trout (Oncorhynchus mykiss)
Rainbow trout (Oncorhynchus mykiss)	DON	in-vivo	56	Pure	Feed	1400	3	54	Juveniles	50.3	148.3	99.3	Satiation	3	Satiation	5702.4	76.6328	-23.3672	1.88571	76.6328	-23.3672	98	1.75	68.0556	-31.9444	0.93	87.7358	-12.2642	0.0265861	Total feed intake is an estimation based on Daily feed intake	Hooft et al.	2019a	Aquaculture	The effects of naturally occurring or purified deoxynivalenol (DON) on growth performance, nutrient utilization and histopathology of rainbow trout (Oncorhynchus mykiss)
Rainbow trout (Oncorhynchus mykiss)	DON	in-vivo	56	Pure	Feed	2100	3	54	Juveniles	50.3	138.7	94.5	Satiation	3	Satiation	4919.4	66.1103	-33.8897	1.62679	66.1103	-33.8897	88.4	1.57857	61.3889	-38.6111	0.98	92.4528	-7.54717	0.0361508	Total feed intake is an estimation based on Daily feed intake	Hooft et al.	2019a	Aquaculture	The effects of naturally occurring or purified deoxynivalenol (DON) on growth performance, nutrient utilization and histopathology of rainbow trout (Oncorhynchus mykiss)
Rainbow trout (Oncorhynchus mykiss)	DON	in-vivo	56	Non-Challenged	Feed	0	3	54	Juveniles	50.3	191.1	120.7	Satiation	3	Satiation	7155	100	0	2.36607	100	0	140.8	2.51429	100	0	1.06	100	0	0	*Apart from DON, other toxins were also present.**Total feed intake is an estimation based on Daily feed intake.	Hooft et al.	2019a	Aquaculture	The effects of naturally occurring or purified deoxynivalenol (DON) on growth performance, nutrient utilization and histopathology of rainbow trout (Oncorhynchus mykiss)
Rainbow trout (Oncorhynchus mykiss)	DON	in-vivo	56	Natural	Feed	2100	3	54	Juveniles	50.3	133.8	92.05	Satiation	3	Satiation	4600.8	64.3019	-35.6981	1.52143	64.3019	-35.6981	83.5	1.49107	59.304	-40.696	1	94.3396	-5.66038	0.0347094	*Apart from DON, other toxins were also present.**Total feed intake is an estimation based on Daily feed intake.	Hooft et al.	2019a	Aquaculture	The effects of naturally occurring or purified deoxynivalenol (DON) on growth performance, nutrient utilization and histopathology of rainbow trout (Oncorhynchus mykiss)
Rainbow trout (Oncorhynchus mykiss)	DON	in-vivo	56	Natural	Feed	4100	3	54	Juveniles	50.3	105.6	77.95	Satiation	3	Satiation	2840.4	39.6981	-60.3019	0.939286	39.6981	-60.3019	55.3	0.9875	39.2756	-60.7244	1.05	99.0566	-0.943396	0.0494044	*Apart from DON, other toxins were also present.**Total feed intake is an estimation based on Daily feed intake.	Hooft et al.	2019a	Aquaculture	The effects of naturally occurring or purified deoxynivalenol (DON) on growth performance, nutrient utilization and histopathology of rainbow trout (Oncorhynchus mykiss)
Rainbow trout (Oncorhynchus mykiss)	DON	in-vivo	56	Natural	Feed	5900	3	54	Juveniles	50.3	84.3	67.3	Satiation	3	Satiation	2197.8	30.717	-69.283	0.726786	30.717	-69.283	34	0.607143	24.1477	-75.8523	0.8	75.4717	-24.5283	0.0637152	*Apart from DON, other toxins were also present.**Total feed intake is an estimation based on Daily feed intake.	Hooft et al.	2019a	Aquaculture	The effects of naturally occurring or purified deoxynivalenol (DON) on growth performance, nutrient utilization and histopathology of rainbow trout (Oncorhynchus mykiss)
Rainbow trout (Oncorhynchus mykiss)	DON	in-vivo	70	Non-Challenged	Feed -low starch (12%)	100	3	75	Juveniles	21.9	111.8	66.85	Satiation	3	Satiation	7222.5	100	0	1.37571	100	0	89.9	1.28429	100	0	0.93	100	0	0.00205791	*Apart from DON, other toxins were also present. **Control diet was not 100% mycotoxins-free ***Total feed intake is an estimation based on Daily feed intake.	Hooft et al.	2019b	Aquaculture	A comparative investigation of the effects of feed-borne deoxynivalenol (DON) on growth performance, nutrient utilization and metabolism of detoxification in rainbow trout (Oncorhynchus mykiss) and Nile tilapia (Oreochromis niloticus) fed diets containing different levels of digestible carbohydrates
Rainbow trout (Oncorhynchus mykiss)	DON	in-vivo	70	Natural	Feed -low starch (12%)	700	3	75	Juveniles	21.9	105.6	63.75	Satiation	3	Satiation	6945	96.1578	-3.84216	1.32286	96.1578	-3.84216	83.7	1.19571	93.1034	-6.89655	0.9	96.7742	-3.22581	0.0145255	*Apart from DON, other toxins were also present. **Control diet was not 100% mycotoxins-free ***Total feed intake is an estimation based on Daily feed intake.	Hooft et al.	2019b	Aquaculture	A comparative investigation of the effects of feed-borne deoxynivalenol (DON) on growth performance, nutrient utilization and metabolism of detoxification in rainbow trout (Oncorhynchus mykiss) and Nile tilapia (Oreochromis niloticus) fed diets containing different levels of digestible carbohydrates
Rainbow trout (Oncorhynchus mykiss)	DON	in-vivo	70	Natural	Feed -low starch (12%)	1300	3	75	Juveniles	21.9	76.3	49.1	Satiation	3	Satiation	5182.5	71.7549	-28.2451	0.987143	71.7549	-28.2451	54.4	0.777143	60.5117	-39.4883	0.79	84.9462	-15.0538	0.0261362	*Apart from DON, other toxins were also present. **Control diet was not 100% mycotoxins-free ***Total feed intake is an estimation based on Daily feed intake.	Hooft et al.	2019b	Aquaculture	A comparative investigation of the effects of feed-borne deoxynivalenol (DON) on growth performance, nutrient utilization and metabolism of detoxification in rainbow trout (Oncorhynchus mykiss) and Nile tilapia (Oreochromis niloticus) fed diets containing different levels of digestible carbohydrates
Rainbow trout (Oncorhynchus mykiss)	DON	in-vivo	70	Non-Challenged	Feed -high starch (24%)	100	3	75	Juveniles	21.9	101.3	61.6	Satiation	3	Satiation	8145	100	0	1.55143	100	0	79.4	1.13429	100	0	0.72	100	0	0.00251855	*Apart from DON, other toxins were also present. **Control diet was not 100% mycotoxins-free ***Total feed intake is an estimation based on Daily feed intake.	Hooft et al.	2019b	Aquaculture	A comparative investigation of the effects of feed-borne deoxynivalenol (DON) on growth performance, nutrient utilization and metabolism of detoxification in rainbow trout (Oncorhynchus mykiss) and Nile tilapia (Oreochromis niloticus) fed diets containing different levels of digestible carbohydrates
Rainbow trout (Oncorhynchus mykiss)	DON	in-vivo	70	Natural	Feed -high starch (24%)	700	3	75	Juveniles	21.9	85	53.45	Satiation	3	Satiation	6922.5	84.9908	-15.0092	1.31857	84.9908	-15.0092	63.1	0.901429	79.471	-20.529	0.68	94.4444	-5.55556	0.0172685	*Apart from DON, other toxins were also present. **Control diet was not 100% mycotoxins-free ***Total feed intake is an estimation based on Daily feed intake.	Hooft et al.	2019b	Aquaculture	A comparative investigation of the effects of feed-borne deoxynivalenol (DON) on growth performance, nutrient utilization and metabolism of detoxification in rainbow trout (Oncorhynchus mykiss) and Nile tilapia (Oreochromis niloticus) fed diets containing different levels of digestible carbohydrates
Rainbow trout (Oncorhynchus mykiss)	DON	in-vivo	70	Natural	Feed -high starch (24%)	1300	3	75	Juveniles	21.9	79.4	50.65	Satiation	3	Satiation	6915	84.8987	-15.1013	1.31714	84.8987	-15.1013	57.5	0.821429	72.4181	-27.5819	0.63	87.5	-12.5	0.0338062	*Apart from DON, other toxins were also present. **Control diet was not 100% mycotoxins-free ***Total feed intake is an estimation based on Daily feed intake.	Hooft et al.	2019b	Aquaculture	A comparative investigation of the effects of feed-borne deoxynivalenol (DON) on growth performance, nutrient utilization and metabolism of detoxification in rainbow trout (Oncorhynchus mykiss) and Nile tilapia (Oreochromis niloticus) fed diets containing different levels of digestible carbohydrates
Rainbow trout (Oncorhynchus mykiss)	DON	in-vivo	60	Non-Challenged	Feed	37	4	200	Fingerlings	2.52	24.77	13.645	Satiation	3	Satiation	3957.05	100	0	0.329754	100	0	22.25	0.370833	100	0	0.934579	100	0	0.000894167	*Apart from DON, Zearalenone , Fumonisin B1 were also present. **Control diet was not 100% mycotoxins-free *** Feed intake % controls was calculated from FI %ABW/d where : ABW= (initial + final BW)/2	Gonçalves et al.	2018	Aquaculture	Impact of deoxynivalenol on rainbow trout: Growth performance, digestibility, key gene expression regulation and metabolism
Rainbow trout (Oncorhynchus mykiss)	DON	in-vivo	60	Pure	Feed	4714	4	200	Fingerlings	2.52	12.52	7.52	Satiation	3	Satiation	1857.44	46.94	-53.06	0.154787	46.94	-53.06	10	0.166667	44.9438	-55.0562	0.892857	95.5357	-4.46429	0.0970298	*Apart from DON, Zearalenone , Fumonisin B1 were also present. **Control diet was not 100% mycotoxins-free *** Feed intake % controls was calculated from FI %ABW/d where : ABW= (initial + final BW)/2	Gonçalves et al.	2018	Aquaculture	Impact of deoxynivalenol on rainbow trout: Growth performance, digestibility, key gene expression regulation and metabolism
Rainbow trout (Oncorhynchus mykiss)	DON	in-vivo	60	Pure	Feed	11412	4	200	Fingerlings	2.52	5.96	4.24	Satiation	3	Satiation	843.76	21.323	-78.677	0.0703133	21.323	-78.677	3.44	0.0573333	15.4607	-84.5393	0.632911	67.7215	-32.2785	0.189249	*Apart from DON, Zearalenone , Fumonisin B1 were also present. **Control diet was not 100% mycotoxins-free *** Feed intake % controls was calculated from FI %ABW/d where : ABW= (initial + final BW)/2	Gonçalves et al.	2018	Aquaculture	Impact of deoxynivalenol on rainbow trout: Growth performance, digestibility, key gene expression regulation and metabolism
Rainbow trout (Oncorhynchus mykiss)	DON	in-vivo	29	Non-Challenged	Feed	37	4	200	Fingerlings	2.52	9.39	5.955	Satiation	3	Satiation	2268.86	100	0	0.391182	100	0	6.87	0.236897	100	0	1.04167	100	0	0.00243052	*Apart from DON, Zearalenone , Fumonisin B1 were also present. **Control diet was not 100% mycotoxins-free *** Feed intake % controls was calculated from FI %ABW/d where : ABW= (initial + final BW)/2	Gonçalves et al.	2018	Aquaculture	Impact of deoxynivalenol on rainbow trout: Growth performance, digestibility, key gene expression regulation and metabolism
Rainbow trout (Oncorhynchus mykiss)	DON	in-vivo	29	Pure	Feed	4714	4	200	Fingerlings	2.52	5.83	4.175	Satiation	3	Satiation	1223.27	53.916	-46.084	0.210909	53.916	-46.084	3.31	0.114138	48.1805	-51.8195	0.925926	88.8889	-11.1111	0.238138	*Apart from DON, Zearalenone , Fumonisin B1 were also present. **Control diet was not 100% mycotoxins-free *** Feed intake % controls was calculated from FI %ABW/d where : ABW= (initial + final BW)/2	Gonçalves et al.	2018	Aquaculture	Impact of deoxynivalenol on rainbow trout: Growth performance, digestibility, key gene expression regulation and metabolism
Rainbow trout (Oncorhynchus mykiss)	DON	in-vivo	29	Pure	Feed	11412	4	200	Fingerlings	2.52	3.9	3.21	Satiation	3	Satiation	683.73	30.1355	-69.8645	0.117884	30.1355	-69.8645	1.38	0.0475862	20.0873	-79.9127	0.641026	61.5385	-38.4615	0.419096	*Apart from DON, Zearalenone , Fumonisin B1 were also present. **Control diet was not 100% mycotoxins-free *** Feed intake % controls was calculated from FI %ABW/d where : ABW= (initial + final BW)/2	Gonçalves et al.	2018	Aquaculture	Impact of deoxynivalenol on rainbow trout: Growth performance, digestibility, key gene expression regulation and metabolism
Rainbow trout (Oncorhynchus mykiss)	DON	in-vivo	50	Non-Challenged	Feed	0	4	60	Fingerlings	14.1	101.36	57.73	Satiation	3	Satiation	4872.6	100	0	1.6242	100	0	87.26	1.7452	100	0	1.02041	100	0	0	*Apart from DON, other toxins were also present.**Total feed intake is an estimation based on Daily feed intake.***Feed efficiency was calculated from given FCR.	Gonçalves et al.	2019	Journal of the World Aquaculture Society	Effects of deoxynivalenol exposure time and contamination levels on rainbow trout
Rainbow trout (Oncorhynchus mykiss)	DON	in-vivo	50	Pure	Feed	1166	4	60	Fingerlings	14.1	95.37	54.735	Satiation	3	Satiation	4899	100.542	0.541805	1.633	100.542	0.541805	81.27	1.6254	93.1355	-6.86454	0.970874	95.1456	-4.85437	0.0347872	*Apart from DON, other toxins were also present.**Total feed intake is an estimation based on Daily feed intake.***Feed efficiency was calculated from given FCR.	Gonçalves et al.	2019	Journal of the World Aquaculture Society	Effects of deoxynivalenol exposure time and contamination levels on rainbow trout
Rainbow trout (Oncorhynchus mykiss)	DON	in-vivo	50	Pure	Feed	2745	4	60	Fingerlings	14.1	79.91	47.005	Satiation	3	Satiation	3841.8	78.845	-21.155	1.2806	78.845	-21.155	65.81	1.3162	75.4183	-24.5817	0.952381	93.3333	-6.66667	0.0747845	*Apart from DON, other toxins were also present.**Total feed intake is an estimation based on Daily feed intake.***Feed efficiency was calculated from given FCR.	Gonçalves et al.	2019	Journal of the World Aquaculture Society	Effects of deoxynivalenol exposure time and contamination levels on rainbow trout
Rainbow trout (Oncorhynchus mykiss)	DON	in-vivo	28	Non-Challenged	Feed	100	3	105	Juveniles	103.2	199.4	151.3	Satiation	2	Satiation	9229.5	100	0	3.13929	100	0	96.2	3.43571	100	0	1.09	100	0	0.00207487	*Apart from DON, a small amount of Zearalenone (<0.1ppm) was also present. **Control diet was not 100% mycotoxins-free (DON and Zearalenone < 0.1 ppm)	Ryerse et al.	2015	Jounal of Fish Diseases	Purified deoxynivalenol or feed restriction reduces mortality in rainbow trout, O ncorhynchus mykiss (Walbaum), with experimental bacterial coldwater disease but biologically relevant concentrations of deoxynivalenol do not impair the growth of F lavobacterium psychrophilum
Rainbow trout (Oncorhynchus mykiss)	DON	in-vivo	28	Natural	Feed	3300	3	105	Juveniles	103.2	167.7	135.45	Satiation	2	Satiation	6552	70.9898	-29.0102	2.22857	70.9898	-29.0102	64.5	2.30357	67.0478	-32.9522	1.03	94.4954	-5.50459	0.0542952	*Apart from DON, a small amount of Zearalenone (<0.1ppm) was also present. **Control diet was not 100% mycotoxins-free (DON and Zearalenone < 0.1 ppm)	Ryerse et al.	2015	Jounal of Fish Diseases	Purified deoxynivalenol or feed restriction reduces mortality in rainbow trout, O ncorhynchus mykiss (Walbaum), with experimental bacterial coldwater disease but biologically relevant concentrations of deoxynivalenol do not impair the growth of F lavobacterium psychrophilum
Rainbow trout (Oncorhynchus mykiss)	DON	in-vivo	28	Pure	Feed	3800	3	105	Juveniles	103.2	159.7	131.45	Satiation	2	Satiation	5838	63.2537	-36.7463	1.98571	63.2537	-36.7463	56.5	2.01786	58.7318	-41.2682	1.02	93.578	-6.42202	0.0574037	*Apart from DON, a small amount of Zearalenone (<0.1ppm) was also present. **Control diet was not 100% mycotoxins-free (DON and Zearalenone < 0.1 ppm)	Ryerse et al.	2015	Jounal of Fish Diseases	Purified deoxynivalenol or feed restriction reduces mortality in rainbow trout, O ncorhynchus mykiss (Walbaum), with experimental bacterial coldwater disease but biologically relevant concentrations of deoxynivalenol do not impair the growth of F lavobacterium psychrophilum
Grass carp (Ctenopharyngodon idella)	DON	in-vivo	60	Non-Challenged	Feed	27	3	240	Juveniles	12.17	78.9	45.535	Satiation	4	Satiation	19046.4	100	0	1.32267	100	0	66.73	1.11217	100	0	0.84	100	0	0.000784276	**Control diet was not 100% mycotoxins-free (DON 270 mg/kg)	Huang et al.	2018	Fish and Shellfish Immunology	Deoxynivalenol decreased the growth performance and impaired intestinal physical barrier in juvenile grass carp (Ctenopharyngodon idella)
Grass carp (Ctenopharyngodon idella)	DON	in-vivo	60	Pure	Feed	318	3	240	Juveniles	12.17	77.19	44.68	Satiation	4	Satiation	18549.6	97.3916	-2.60837	1.28817	97.3916	-2.60837	65.02	1.08367	97.4374	-2.56257	0.84	100	0	0.00916824	**Control diet was not 100% mycotoxins-free (DON 270 mg/kg)	Huang et al.	2018	Fish and Shellfish Immunology	Deoxynivalenol decreased the growth performance and impaired intestinal physical barrier in juvenile grass carp (Ctenopharyngodon idella)
Grass carp (Ctenopharyngodon idella)	DON	in-vivo	60	Pure	Feed	636	3	240	Juveniles	12.17	67.34	39.755	Satiation	4	Satiation	16896	88.7097	-11.2903	1.17333	88.7097	-11.2903	55.17	0.9195	82.6765	-17.3235	0.78	92.8571	-7.14286	0.018771	**Control diet was not 100% mycotoxins-free (DON 270 mg/kg)	Huang et al.	2018	Fish and Shellfish Immunology	Deoxynivalenol decreased the growth performance and impaired intestinal physical barrier in juvenile grass carp (Ctenopharyngodon idella)
Grass carp (Ctenopharyngodon idella)	DON	in-vivo	60	Pure	Feed	922	3	240	Juveniles	12.17	63.69	37.93	Satiation	4	Satiation	16428	86.2525	-13.7475	1.14083	86.2525	-13.7475	51.52	0.858667	77.2067	-22.7933	0.75	89.2857	-10.7143	0.0277313	**Control diet was not 100% mycotoxins-free (DON 270 mg/kg)	Huang et al.	2018	Fish and Shellfish Immunology	Deoxynivalenol decreased the growth performance and impaired intestinal physical barrier in juvenile grass carp (Ctenopharyngodon idella)
Grass carp (Ctenopharyngodon idella)	DON	in-vivo	60	Pure	Feed	1243	3	240	Juveniles	12.17	60.55	36.36	Satiation	4	Satiation	16233.6	85.2319	-14.7681	1.12733	85.2319	-14.7681	48.38	0.806333	72.5011	-27.4989	0.72	85.7143	-14.2857	0.0385389	**Control diet was not 100% mycotoxins-free (DON 270 mg/kg)	Huang et al.	2018	Fish and Shellfish Immunology	Deoxynivalenol decreased the growth performance and impaired intestinal physical barrier in juvenile grass carp (Ctenopharyngodon idella)
Grass carp (Ctenopharyngodon idella)	DON	in-vivo	60	Pure	Feed	1515	3	240	Juveniles	12.17	55.13	33.65	Satiation	4	Satiation	15784.8	82.8755	-17.1245	1.09617	82.8755	-17.1245	42.96	0.716	64.3788	-35.6212	0.65	77.381	-22.619	0.0493519	**Control diet was not 100% mycotoxins-free (DON 270 mg/kg)	Huang et al.	2018	Fish and Shellfish Immunology	Deoxynivalenol decreased the growth performance and impaired intestinal physical barrier in juvenile grass carp (Ctenopharyngodon idella)
Nile tilapia (Oreochromis niloticus)	DON	in-vivo	70	Non-Challenged	Feed -low starch (12%)	100	3	75	Fingerlings	8.1	99.6	53.85	Satiation	3	Satiation	6577.5	100	0	1.25286	100	0	91.5	1.30714	100	0	1.04	100	0	0.00232657	*Apart from DON, other toxins were also present. **Control diet was not 100% mycotoxins-free ***Total feed intake is an estimation based on Daily feed intake.	Hooft et al.	2019b	Aquaculture	A comparative investigation of the effects of feed-borne deoxynivalenol (DON) on growth performance, nutrient utilization and metabolism of detoxification in rainbow trout (Oncorhynchus mykiss) and Nile tilapia (Oreochromis niloticus) fed diets containing different levels of digestible carbohydrates
Nile tilapia (Oreochromis niloticus)	DON	in-vivo	70	Natural	Feed -low starch (12%)	700	3	75	Fingerlings	8.1	121.1	64.6	Satiation	3	Satiation	8100	123.147	23.1471	1.54286	123.147	23.1471	113	1.61429	123.497	23.4973	1.04	100	0	0.0167183	*Apart from DON, other toxins were also present. **Control diet was not 100% mycotoxins-free ***Total feed intake is an estimation based on Daily feed intake.	Hooft et al.	2019b	Aquaculture	A comparative investigation of the effects of feed-borne deoxynivalenol (DON) on growth performance, nutrient utilization and metabolism of detoxification in rainbow trout (Oncorhynchus mykiss) and Nile tilapia (Oreochromis niloticus) fed diets containing different levels of digestible carbohydrates
Nile tilapia (Oreochromis niloticus)	DON	in-vivo	70	Natural	Feed -low starch (12%)	1300	3	75	Fingerlings	8.1	123.8	65.95	Satiation	3	Satiation	8400	127.708	27.7081	1.6	127.708	27.7081	115.7	1.65286	126.448	26.4481	1.03	99.0385	-0.961538	0.031539	*Apart from DON, other toxins were also present. **Control diet was not 100% mycotoxins-free ***Total feed intake is an estimation based on Daily feed intake.	Hooft et al.	2019b	Aquaculture	A comparative investigation of the effects of feed-borne deoxynivalenol (DON) on growth performance, nutrient utilization and metabolism of detoxification in rainbow trout (Oncorhynchus mykiss) and Nile tilapia (Oreochromis niloticus) fed diets containing different levels of digestible carbohydrates
Nile tilapia (Oreochromis niloticus)	DON	in-vivo	70	Non-Challenged	Feed -high starch (24%)	100	3	75	Fingerlings	8.1	98.4	53.25	Satiation	3	Satiation	7567.5	100	0	1.44143	100	0	90.3	1.29	100	0	0.9	100	0	0.00270691	*Apart from DON, other toxins were also present. **Control diet was not 100% mycotoxins-free ***Total feed intake is an estimation based on Daily feed intake.	Hooft et al.	2019b	Aquaculture	A comparative investigation of the effects of feed-borne deoxynivalenol (DON) on growth performance, nutrient utilization and metabolism of detoxification in rainbow trout (Oncorhynchus mykiss) and Nile tilapia (Oreochromis niloticus) fed diets containing different levels of digestible carbohydrates
Nile tilapia (Oreochromis niloticus)	DON	in-vivo	70	Natural	Feed -high starch (24%)	700	3	75	Fingerlings	8.1	83.8	45.95	Satiation	3	Satiation	6180	81.665	-18.335	1.17714	81.665	-18.335	75.7	1.08143	83.8317	-16.1683	0.92	102.222	2.22222	0.0179325	*Apart from DON, other toxins were also present. **Control diet was not 100% mycotoxins-free ***Total feed intake is an estimation based on Daily feed intake.	Hooft et al.	2019b	Aquaculture	A comparative investigation of the effects of feed-borne deoxynivalenol (DON) on growth performance, nutrient utilization and metabolism of detoxification in rainbow trout (Oncorhynchus mykiss) and Nile tilapia (Oreochromis niloticus) fed diets containing different levels of digestible carbohydrates
Nile tilapia (Oreochromis niloticus)	DON	in-vivo	70	Natural	Feed -high starch (24%)	1300	3	75	Fingerlings	8.1	90.6	49.35	Satiation	3	Satiation	7042.5	93.0624	-6.93756	1.34143	93.0624	-6.93756	82.5	1.17857	91.3621	-8.63787	0.88	97.7778	-2.22222	0.0353365	*Apart from DON, other toxins were also present. **Control diet was not 100% mycotoxins-free ***Total feed intake is an estimation based on Daily feed intake.	Hooft et al.	2019b	Aquaculture	A comparative investigation of the effects of feed-borne deoxynivalenol (DON) on growth performance, nutrient utilization and metabolism of detoxification in rainbow trout (Oncorhynchus mykiss) and Nile tilapia (Oreochromis niloticus) fed diets containing different levels of digestible carbohydrates
Red Tilapia (Oreochromis niloticus × O. mossambicus)	DON	in-vivo	56	Non-Challenged	Feed	70	4	200	Fingerlings	4.3	41.7	23	Satiation	3	Satiation	10500	100	0	0.9375	100	0	37.4	0.667857	100	0	0.71	100	0	0.00285326	*Apart from DON, graded doses of ZEA are included (0.01 mg/kg) **Control diet was not 100% mycotoxins-free (ZEA are included 0.01 mg/kg)	Tola et al.	2015	Toxins	Effects of Wheat Naturally Contaminated with Fusarium Mycotoxins on Growth Performance and Selected Health Indices of Red Tilapia (Oreochromis niloticus × O. mossambicus)
Red Tilapia (Oreochromis niloticus × O. mossambicus)	DON	in-vivo	56	Natural	Feed	310	4	200	Fingerlings	4.3	39.2	21.75	Satiation	3	Satiation	9900	94.2857	-5.71429	0.883929	94.2857	-5.71429	34.9	0.623214	93.3155	-6.68449	0.7	98.5915	-1.40845	0.0125985	*Apart from DON, graded doses of ZEA are included (0.09 mg/kg)	Tola et al.	2015	Toxins	Effects of Wheat Naturally Contaminated with Fusarium Mycotoxins on Growth Performance and Selected Health Indices of Red Tilapia (Oreochromis niloticus × O. mossambicus)
Red Tilapia (Oreochromis niloticus × O. mossambicus)	DON	in-vivo	56	Natural	Feed	500	4	200	Fingerlings	4.3	38.3	21.3	Satiation	3	Satiation	9900	94.2857	-5.71429	0.883929	94.2857	-5.71429	34	0.607143	90.9091	-9.09091	0.69	97.1831	-2.8169	0.0207495	*Apart from DON, graded doses of ZEA are included (0.21 mg/kg)	Tola et al.	2015	Toxins	Effects of Wheat Naturally Contaminated with Fusarium Mycotoxins on Growth Performance and Selected Health Indices of Red Tilapia (Oreochromis niloticus × O. mossambicus)
Red Tilapia (Oreochromis niloticus × O. mossambicus)	DON	in-vivo	56	Natural	Feed	920	4	200	Fingerlings	4.3	35.9	20.1	Satiation	3	Satiation	9440	89.9048	-10.0952	0.842857	89.9048	-10.0952	31.6	0.564286	84.492	-15.508	0.67	94.3662	-5.6338	0.0385785	*Apart from DON, graded doses of ZEA are included (0.37 mg/kg)	Tola et al.	2015	Toxins	Effects of Wheat Naturally Contaminated with Fusarium Mycotoxins on Growth Performance and Selected Health Indices of Red Tilapia (Oreochromis niloticus × O. mossambicus)
Red Tilapia (Oreochromis niloticus × O. mossambicus)	DON	in-vivo	56	Natural	Feed	1150	4	200	Fingerlings	4.3	33.9	19.1	Satiation	3	Satiation	9160	87.2381	-12.7619	0.817857	87.2381	-12.7619	29.6	0.528571	79.1444	-20.8556	0.65	91.5493	-8.4507	0.0492427	*Apart from DON, graded doses of ZEA are included (0.98 mg/kg)	Tola et al.	2015	Toxins	Effects of Wheat Naturally Contaminated with Fusarium Mycotoxins on Growth Performance and Selected Health Indices of Red Tilapia (Oreochromis niloticus × O. mossambicus)
Channel catfish (Ictalurus punctatus)	DON	in-vivo	49	Non-Challenged	Feed	0	8	160	Fingerlings	5.87	18.99	12.43	Restrictively	1	based on percent of aquarium total body weight	2619.2	100	0	0.334082	100	0	13.12	0.267755	100	0	0.8	100	0	0		Manning et al.	2014	Aquaculture Research	The effect of feeding diets containing deoxynivalenol contaminated corn on channel catfish (Ictalurus punctatus) challenged with Edwardsiella ictaluri
Channel catfish (Ictalurus punctatus)	DON	in-vivo	49	Natural	Feed	3300	8	160	Fingerlings	5.87	18.39	12.13	Restrictively	1	based on percent of aquarium total body weight	2616	99.8778	-0.122175	0.333673	99.8778	-0.122175	12.52	0.25551	95.4268	-4.57317	0.763359	95.4198	-4.58015	0.0907768		Manning et al.	2014	Aquaculture Research	The effect of feeding diets containing deoxynivalenol contaminated corn on channel catfish (Ictalurus punctatus) challenged with Edwardsiella ictaluri
Channel catfish (Ictalurus punctatus)	DON	in-vivo	49	Natural	Feed	5500	8	160	Fingerlings	5.87	18.36	12.115	Restrictively	1	based on percent of aquarium total body weight	2528	96.518	-3.48198	0.322449	96.518	-3.48198	12.49	0.254898	95.1982	-4.80183	0.793651	99.2063	-0.793651	0.146386		Manning et al.	2014	Aquaculture Research	The effect of feeding diets containing deoxynivalenol contaminated corn on channel catfish (Ictalurus punctatus) challenged with Edwardsiella ictaluri
Channel catfish (Ictalurus punctatus)	DON	in-vivo	49	Natural	Feed	7700	8	160	Fingerlings	5.87	18.57	12.22	Restrictively	1	based on percent of aquarium total body weight	2548.8	97.3122	-2.68784	0.325102	97.3122	-2.68784	12.7	0.259184	96.7988	-3.20122	0.793651	99.2063	-0.793651	0.204852		Manning et al.	2014	Aquaculture Research	The effect of feeding diets containing deoxynivalenol contaminated corn on channel catfish (Ictalurus punctatus) challenged with Edwardsiella ictaluri
Channel catfish (Ictalurus punctatus)	DON	in-vivo	49	Natural	Feed	8800	8	160	Fingerlings	5.87	18.93	12.4	Restrictively	1	based on percent of aquarium total body weight	2521.6	96.2737	-3.72633	0.321633	96.2737	-3.72633	13.06	0.266531	99.5427	-0.457317	0.826446	103.306	3.30579	0.228255		Manning et al.	2014	Aquaculture Research	The effect of feeding diets containing deoxynivalenol contaminated corn on channel catfish (Ictalurus punctatus) challenged with Edwardsiella ictaluri
